# Supplementary material for: Chloroplast genome sequencing and evolutionary analysis of Ecklonia maxima and its comparison and phylogenetic analysis with its close relatives
Source: Research Square preprint supplement (doi:10.21203/rs.3.rs-7481212/v1), 2025-10-08
Supplement: Supplementary file 1 [file 364a80a7923e502f1d691be7.xlsx]

## Sheet: all.KaKs
Table S5:The Ka/Ks value of Ecklonia maxima and five other Ecklonia species
Ref	Query	Ka	Ks	Ka/Ks	P-Value(Fisher)	Length
PP471197_acsF-MZ156038_acsF		0.000943503	0.0589774	0.0159977	0	1098
PP471197_acsF-MZ156040_acsF		4.41445e-05	0.0441445	0.001	0	1098
PP471197_acsF-NC_070408_acsF		9.82883e-06	0.00982883	0.001	0	1098
PP471197_acsF-NC_085303_acsF		1.91878e-05	0.0191878	0.001	0	1098
PP471197_acsF-ON552965_acsF		1.91878e-05	0.0191878	0.001	0	1098
PP471197_atpA-MZ156038_atpA		2.95896e-05	0.0295896	0.001	0	1503
PP471197_atpA-MZ156040_atpA		1.92849e-05	0.0192849	0.001	0	1503
PP471197_atpA-NC_070408_atpA		8.01287e-06	0.00801287	0.001	0	1503
PP471197_atpA-NC_085303_atpA		1.68674e-05	0.0168674	0.001	0	1503
PP471197_atpA-ON552965_atpA		1.68674e-05	0.0168674	0.001	0	1503
PP471197_atpB-MZ156038_atpB		0.000913098	0.0111352	0.0820008	0.0201534	1443
PP471197_atpB-MZ156040_atpB		0.000774453	0.0510931	0.0151577	8.49685e-06	1443
PP471197_atpB-NC_070408_atpB		0.000590648	0.0144776	0.0407973	0	1443
PP471197_atpB-NC_085303_atpB		0.000774453	0.0510931	0.0151577	8.49685e-06	1443
PP471197_atpB-ON552965_atpB		0.000774453	0.0510931	0.0151577	8.49685e-06	1443
PP471197_atpD-MZ156038_atpD		0.00398323	0.0197798	0.201379	0.0161168	615
PP471197_atpD-MZ156040_atpD		0.00388022	0.0240842	0.161111	0.0142429	615
PP471197_atpD-NC_070408_atpD		1.65901e-05	0.0165901	0.001	0	615
PP471197_atpD-NC_085303_atpD		9.94917e-06	0.00994917	0.001	0	615
PP471197_atpD-ON552965_atpD		9.94917e-06	0.00994917	0.001	0	615
PP471197_atpE-MZ156038_atpE		0.00106066	0.100467	0.0105573	0	402
PP471197_atpE-MZ156040_atpE		2.8896e-05	0.028896	0.001	0	402
PP471197_atpE-NC_070408_atpE		1.45366e-05	0.0145366	0.001	0	402
PP471197_atpE-NC_085303_atpE		1.45211e-05	0.0145211	0.001	0	402
PP471197_atpE-ON552965_atpE		1.45211e-05	0.0145211	0.001	0	402
PP471197_atpF-MZ156038_atpF		0.00454409	0.0130531	0.348122	0.0657515	522
PP471197_atpF-MZ156040_atpF		1.17387e-05	0.0117387	0.001	0	522
PP471197_atpF-NC_070408_atpF		1.17387e-05	0.0117387	0.001	0	522
PP471197_atpF-NC_085303_atpF		1.17387e-05	0.0117387	0.001	0	522
PP471197_atpF-ON552965_atpF		1.17387e-05	0.0117387	0.001	0	522
PP471197_atpG-MZ156038_atpG		0.00715943	0.0228022	0.31398	0.0503454	468
PP471197_atpG-MZ156040_atpG		0.00249648	0.0330975	0.0754278	0	468
PP471197_atpG-NC_085303_atpG		4.03676e-05	0.0403676	0.001	0	468
PP471197_atpG-ON552965_atpG		4.03676e-05	0.0403676	0.001	0	468
PP471197_atpI-MZ156038_atpI		0.00162412	0.0175773	0.0923987	0	744
PP471197_atpI-MZ156040_atpI		2.22642e-05	0.0222642	0.001	0	744
PP471197_atpI-NC_070408_atpI		7.46642e-06	0.00746642	0.001	0	744
PP471197_atpI-NC_085303_atpI		7.46642e-06	0.00746642	0.001	0	744
PP471197_atpI-ON552965_atpI		7.46642e-06	0.00746642	0.001	0	744
PP471197_cbbx-MZ156038_cbbx		0.0011646	0.0202256	0.0575802	0	900
PP471197_cbbx-MZ156040_cbbx		0.00115979	0.0337995	0.0343137	0	900
PP471197_cbbx-NC_070408_cbbx		6.59048e-06	0.00659048	0.001	0	900
PP471197_cbbx-NC_085303_cbbx		0.00116528	0.0480762	0.0242383	0	900
PP471197_cbbx-ON552965_cbbx		0.00123221	0.0605556	0.0203485	0	900
PP471197_ccs1-MZ156038_ccs1		0.00149535	0.0535772	0.0279103	1.67388e-07	1284
PP471197_ccs1-MZ156040_ccs1		0.000850435	0.0383932	0.0221507	0	1284
PP471197_ccs1-NC_070408_ccs1		0.000927053	0.0107288	0.0864079	0	1284
PP471197_ccs1-NC_085303_ccs1		0.0036103	0.0242525	0.148863	0.00158967	1284
PP471197_ccs1-ON552965_ccs1		0.0036103	0.0242525	0.148863	0.00158967	1284
PP471197_ccsA-MZ156038_ccsA		0.00108139	0.0741732	0.0145793	0	984
PP471197_ccsA-MZ156040_ccsA		3.65525e-05	0.0365525	0.001	0	984
PP471197_ccsA-NC_070408_ccsA		5.9215e-06	0.0059215	0.001	0	984
PP471197_ccsA-NC_085303_ccsA		1.79421e-05	0.0179421	0.001	0	984
PP471197_ccsA-ON552965_ccsA		1.79421e-05	0.0179421	0.001	0	984
PP471197_chlB-MZ156038_chlB		0.000936647	0.0695105	0.0134749	1.0671e-10	1530
PP471197_chlB-MZ156040_chlB		0.000392449	0.0772209	0.00508216	0	1530
PP471197_chlB-NC_070408_chlB		0.000689054	0.040839	0.0168725	0	1530
PP471197_chlB-NC_085303_chlB		0.000392449	0.0772209	0.00508216	0	1530
PP471197_chlB-ON552965_chlB		0.000392449	0.0772209	0.00508216	0	1530
PP471197_chlI-MZ156038_chlI		0.00303184	0.059792	0.0507065	5.14985e-06	1020
PP471197_chlI-MZ156040_chlI		0.00302238	0.0432484	0.0698842	0.000162937	1020
PP471197_chlI-NC_070408_chlI		0.00331619	0.00811882	0.408457	0.11119	1020
PP471197_chlI-NC_085303_chlI		0.00304667	0.0248849	0.122431	0.00610078	1020
PP471197_chlI-ON552965_chlI		0.00304667	0.0248849	0.122431	0.00610078	1020
PP471197_chlL-MZ156038_chlL		0.00012816	0.12816	0.001	0	882
PP471197_chlL-MZ156040_chlL		1.45732e-05	0.0145732	0.001	0	882
PP471197_chlL-NC_070408_chlL		3.94206e-05	0.0394206	0.001	0	882
PP471197_chlL-NC_085303_chlL		2.51779e-05	0.0251779	0.001	0	882
PP471197_chlL-ON552965_chlL		0.00106246	0.030147	0.0352428	0	882
PP471197_chlN-MZ156038_chlN		5.85311e-05	0.0585311	0.001	0	1356
PP471197_chlN-MZ156040_chlN		2.68035e-05	0.0268035	0.001	0	1356
PP471197_chlN-NC_070408_chlN		4.67325e-06	0.00467325	0.001	0	1356
PP471197_chlN-NC_085303_chlN		2.68035e-05	0.0268035	0.001	0	1356
PP471197_chlN-ON552965_chlN		4.05765e-05	0.0405765	0.001	0	1356
PP471197_clpC-MZ156038_clpC		0.000452545	0.0308451	0.0146715	0	2676
PP471197_clpC-MZ156040_clpC		0.000275387	0.0256217	0.0107482	0	2676
PP471197_clpC-NC_070408_clpC		0.000888178	0.0106618	0.0833043	0.00017164	2676
PP471197_clpC-NC_085303_clpC		2.52999e-05	0.0252999	0.001	0	2676
PP471197_clpC-ON552965_clpC		2.52999e-05	0.0252999	0.001	0	2676
PP471197_cp30-MZ156038_cp30		0.00315867	0.148294	0.0213	1.1908e-08	693
PP471197_cp30-MZ156040_cp30		0.0016497	0.0686391	0.0240343	0	693
PP471197_cp30-NC_070408_cp30		8.54057e-06	0.00854057	0.001	0	693
PP471197_cp30-NC_085303_cp30		0.0016497	0.0686391	0.0240343	0	693
PP471197_cp30-ON552965_cp30		0.0016497	0.0686391	0.0240343	0	693
PP471197_cp74-MZ156038_cp74		0.0103199	0.0242383	0.42577	0.0536438	1566
PP471197_cp74-MZ156040_cp74		0.0103268	0.0315647	0.327162	0.0058115	1566
PP471197_cp74-NC_070408_cp74		0.00241964	0.00320628	0.754657	0.589432	1566
PP471197_cp74-NC_085303_cp74		0.0101832	0.0228303	0.446039	0.0396529	1566
PP471197_cp74-ON552965_cp74		0.0101832	0.0228303	0.446039	0.0396529	1566
PP471197_dnaB-MZ156038_dnaB		0.00169038	0.0526075	0.032132	5.87521e-10	1449
PP471197_dnaB-MZ156040_dnaB		0.00172509	0.0317497	0.054334	1.50244e-06	1449
PP471197_dnaB-NC_070408_dnaB		6.57245e-06	0.00657245	0.001	0	1449
PP471197_dnaB-NC_085303_dnaB		0.000825999	0.0327843	0.025195	0	1449
PP471197_dnaB-ON552965_dnaB		0.000825999	0.0327843	0.025195	0	1449
PP471197_dnaK-MZ156038_dnaK		0.00113375	0.0479386	0.0236501	1.35606e-10	1890
PP471197_dnaK-MZ156040_dnaK		4.51741e-05	0.0451741	0.001	0	1890
PP471197_dnaK-NC_070408_dnaK		1.85089e-05	0.0185089	0.001	0	1890
PP471197_dnaK-NC_085303_dnaK		4.41235e-05	0.0441235	0.001	0	1890
PP471197_dnaK-ON552965_dnaK		4.41235e-05	0.0441235	0.001	0	1890
PP471197_ftrB-MZ156038_ftrB		3.93382e-05	0.0393382	0.001	0	345
PP471197_ftsH-MZ156038_ftsH		2.00319e-05	0.0200319	0.001	0	1884
PP471197_ftsH-MZ156040_ftsH		5.89103e-06	0.00589103	0.001	0	1884
PP471197_ftsH-NC_070408_ftsH		3.0528e-06	0.0030528	0.001	0	1884
PP471197_ftsH-NC_085303_ftsH		3.04431e-06	0.00304431	0.001	0	1884
PP471197_ftsH-ON552965_ftsH		6.10361e-06	0.00610361	0.001	0	1884
PP471197_groEL-MZ156038_groEL		0.00109954	0.0442055	0.0248733	1.20085e-08	1536
PP471197_groEL-MZ156040_groEL		0.000687549	0.0437156	0.0157278	0	1536
PP471197_groEL-NC_070408_groEL		0.000823174	0.0110764	0.0743181	0.0171951	1536
PP471197_groEL-NC_085303_groEL		3.33368e-05	0.0333368	0.001	0	1536
PP471197_groEL-ON552965_groEL		3.33368e-05	0.0333368	0.001	0	1536
PP471197_ilvB-MZ156038_ilvB		2.49016e-05	0.0249016	0.001	0	2166
PP471197_ilvB-MZ156040_ilvB		0.000706924	0.0302679	0.0233556	6.67745e-08	2166
PP471197_ilvB-NC_070408_ilvB		5.68253e-06	0.00568253	0.001	0	2166
PP471197_ilvB-NC_085303_ilvB		0.000691275	0.0281014	0.0245993	2.77362e-07	2166
PP471197_ilvB-ON552965_ilvB		0.000691275	0.0281014	0.0245993	2.77362e-07	2166
PP471197_ilvH-MZ156038_ilvH		0.00404928	0.0241836	0.167439	0.0878016	600
PP471197_ilvH-MZ156040_ilvH		0.0015696	0.0458348	0.0342447	0	600
PP471197_ilvH-NC_070408_ilvH		0.00201155	0.012167	0.165328	0.228007	600
PP471197_ilvH-NC_085303_ilvH		0.00157912	0.0354701	0.0445198	0	600
PP471197_ilvH-ON552965_ilvH		0.00157912	0.0354701	0.0445198	0	600
PP471197_petA-MZ156038_petA		4.41576e-05	0.0441576	0.001	0	945
PP471197_petA-MZ156040_petA		0.00140085	0.0427064	0.0328018	0	945
PP471197_petA-NC_070408_petA		1.14366e-05	0.0114366	0.001	0	945
PP471197_petA-NC_085303_petA		0.00140085	0.0427064	0.0328018	0	945
PP471197_petA-ON552965_petA		0.0026738	0.0493851	0.0541418	1.44763e-06	945
PP471197_petB-MZ156038_petB		3.13272e-05	0.0313272	0.001	0	645
PP471197_petB-MZ156040_petB		4.26513e-05	0.0426513	0.001	0	645
PP471197_petB-NC_085303_petB		8.26084e-06	0.00826084	0.001	0	645
PP471197_petB-ON552965_petB		8.26084e-06	0.00826084	0.001	0	645
PP471197_petD-MZ156038_petD		2.05427e-05	0.0205427	0.001	0	480
PP471197_petD-MZ156040_petD		4.18862e-05	0.0418862	0.001	0	480
PP471197_petD-NC_085303_petD		1.01916e-05	0.0101916	0.001	0	480
PP471197_petD-ON552965_petD		1.01916e-05	0.0101916	0.001	0	480
PP471197_petF-MZ156038_petF		0.0293437	0.0457232	0.641767	0.202224	291
PP471197_petF-MZ156040_petF		0.0485526	0.0399071	1.21664	0.940275	291
PP471197_petF-NC_085303_petF		0.0492057	0.0383983	1.28146	0.9423	291
PP471197_petF-ON552965_petF		0.0492057	0.0383983	1.28146	0.9423	291
PP471197_petJ-MZ156038_petJ		0.0178625	0.0984975	0.18135	0.00538496	330
PP471197_petJ-MZ156040_petJ		0.00703177	0.0510282	0.137802	0.00984806	330
PP471197_petJ-NC_070408_petJ		2.05086e-05	0.0205086	0.001	0	330
PP471197_petJ-NC_085303_petJ		0.00703177	0.0510282	0.137802	0.00984806	330
PP471197_petJ-ON552965_petJ		0.00703177	0.0510282	0.137802	0.00984806	330
PP471197_petM-MZ156040_petM		4.08803e-05	0.0408803	0.001	0	96
PP471197_psaA-MZ156038_psaA		0.000408201	0.0280928	0.0145305	0	2247
PP471197_psaA-MZ156040_psaA		0.000478418	0.0336413	0.0142211	0	2247
PP471197_psaA-NC_070408_psaA		6.68433e-06	0.00668433	0.001	0	2247
PP471197_psaA-NC_085303_psaA		0.000485177	0.0250045	0.0194036	0	2247
PP471197_psaA-ON552965_psaA		0.000485177	0.0250045	0.0194036	0	2247
PP471197_psaB-MZ156038_psaB		4.18361e-05	0.0418361	0.001	0	2202
PP471197_psaB-MZ156040_psaB		0.00101503	0.0175828	0.0577287	3.71152e-05	2202
PP471197_psaB-NC_070408_psaB		0.00110049	0.00341066	0.322661	0.0653053	2202
PP471197_psaB-NC_085303_psaB		0.00101514	0.0175871	0.0577208	3.71498e-05	2202
PP471197_psaB-ON552965_psaB		0.00101514	0.0175871	0.0577208	3.71498e-05	2202
PP471197_psaC-NC_070408_psaC		2.40641e-05	0.0240641	0.001	0	243
PP471197_psaD-MZ156038_psaD		0.00887031	0.0897863	0.0987935	0.000383659	396
PP471197_psaD-MZ156040_psaD		3.20927e-05	0.0320927	0.001	0	396
PP471197_psaD-NC_070408_psaD		2.04547e-05	0.0204547	0.001	0	396
PP471197_psaD-NC_085303_psaD		5.60387e-05	0.0560387	0.001	0	396
PP471197_psaD-ON552965_psaD		5.60387e-05	0.0560387	0.001	0	396
PP471197_psaE-MZ156040_psaE		0.0137025	0.0315154	0.434787	0.0776189	183
PP471197_psaE-NC_085303_psaE		3.04413e-05	0.0304413	0.001	0	183
PP471197_psaE-ON552965_psaE		3.04413e-05	0.0304413	0.001	0	183
PP471197_psaF-MZ156038_psaF		3.84749e-05	0.0384749	0.001	0	606
PP471197_psaF-MZ156040_psaF		0.00200476	0.0310562	0.0645527	0	606
PP471197_psaF-NC_070408_psaF		1.57231e-05	0.0157231	0.001	0	606
PP471197_psaF-NC_085303_psaF		0.00362846	0.0616326	0.0588725	0.000122299	606
PP471197_psaF-ON552965_psaF		0.00362846	0.0616326	0.0588725	0.000122299	606
PP471197_psaI-MZ156038_psaI		0.000155402	0.155402	0.001	0	108
PP471197_psaJ-MZ156040_psaJ		4.76497e-05	0.0476497	0.001	0	126
PP471197_psaL-MZ156038_psaL		0.00272319	0.138894	0.0196063	0	435
PP471197_psaL-MZ156040_psaL		0.000143295	0.143295	0.001	0	435
PP471197_psaL-NC_070408_psaL		3.52387e-05	0.0352387	0.001	0	435
PP471197_psaL-NC_085303_psaL		0.000141673	0.141673	0.001	0	435
PP471197_psaL-ON552965_psaL		0.000141673	0.141673	0.001	0	435
PP471197_psbA-MZ156038_psbA		4.50284e-06	0.00450284	0.001	0	1083
PP471197_psbB-MZ156038_psbB		1.51851e-05	0.0151851	0.001	0	1530
PP471197_psbB-MZ156040_psbB		0.000367252	0.0390171	0.00941258	0	1530
PP471197_psbB-NC_070408_psbB		0.000804845	0.0117731	0.068363	0	1530
PP471197_psbB-NC_085303_psbB		0.000785825	0.0131124	0.0599298	0	1530
PP471197_psbB-ON552965_psbB		0.000785825	0.0131124	0.0599298	0	1530
PP471197_psbC-MZ156038_psbC		3.32203e-05	0.0332203	0.001	0	1422
PP471197_psbC-MZ156040_psbC		0.000769308	0.0290818	0.0264532	0	1422
PP471197_psbC-NC_070408_psbC		3.76686e-06	0.00376686	0.001	0	1422
PP471197_psbC-NC_085303_psbC		0.000769413	0.0290933	0.0264464	0	1422
PP471197_psbC-ON552965_psbC		0.000769413	0.0290933	0.0264464	0	1422
PP471197_psbD-MZ156038_psbD		0.00234578	0.0162218	0.144606	0.00713831	1053
PP471197_psbD-MZ156040_psbD		0.00128028	0.0107882	0.118674	0	1053
PP471197_psbD-NC_070408_psbD		0.00125121	0.0128729	0.0971974	0	1053
PP471197_psbD-NC_085303_psbD		0.00125336	0.0128142	0.0978104	0	1053
PP471197_psbD-ON552965_psbD		0.00128028	0.0107882	0.118674	0	1053
PP471197_psbE-MZ156040_psbE		2.45936e-05	0.0245936	0.001	0	252
PP471197_psbE-NC_085303_psbE		2.45936e-05	0.0245936	0.001	0	252
PP471197_psbE-ON552965_psbE		2.45936e-05	0.0245936	0.001	0	252
PP471197_psbF-MZ156038_psbF		0.00958094	0.0453285	0.211367	0	129
PP471197_psbF-NC_070408_psbF		0.00958094	0.0453285	0.211367	0	129
PP471197_psbJ-MZ156040_psbJ		6.83625e-05	0.0683625	0.001	0	117
PP471197_psbJ-NC_085303_psbJ		3.1767e-05	0.031767	0.001	0	117
PP471197_psbJ-ON552965_psbJ		3.1767e-05	0.031767	0.001	0	117
PP471197_psbL-MZ156040_psbL		4.78225e-05	0.0478225	0.001	0	114
PP471197_psbL-NC_085303_psbL		4.78225e-05	0.0478225	0.001	0	114
PP471197_psbL-ON552965_psbL		4.78225e-05	0.0478225	0.001	0	114
PP471197_psbT-NC_070408_psbT		3.17141e-05	0.0317141	0.001	0	123
PP471197_psbV-MZ156038_psbV		0.00490824	0.0303954	0.16148	0.011681	483
PP471197_psbV-MZ156040_psbV		0.00245298	0.0453589	0.0540792	0	483
PP471197_psbV-NC_085303_psbV		0.00245017	0.0301861	0.0811688	0	483
PP471197_psbV-ON552965_psbV		0.00245017	0.0301861	0.0811688	0	483
PP471197_psbW-MZ156038_psbW		6.36802e-05	0.0636802	0.001	0	342
PP471197_psbX-MZ156038_psbX		0.000137913	0.137913	0.001	0	129
PP471197_psbX-MZ156040_psbX		0.000369553	0.369553	0.001	0	129
PP471197_psbX-NC_070408_psbX		0.000137913	0.137913	0.001	0	129
PP471197_psbX-NC_085303_psbX		0.000137913	0.137913	0.001	0	129
PP471197_psbX-ON552965_psbX		0.000137913	0.137913	0.001	0	129
PP471197_rbcL-MZ156038_rbcL		0.00416984	0.00421166	0.99007	0.29883	1464
PP471197_rbcL-MZ156040_rbcL		0.00230703	0.0104814	0.220107	0.0339808	1464
PP471197_rbcL-NC_070408_rbcL		0.00395087	0.0172669	0.228812	0.0155113	1461
PP471197_rbcL-NC_085303_rbcL		0.00230703	0.0104814	0.220107	0.0339808	1464
PP471197_rbcL-ON552965_rbcL		0.00230703	0.0104814	0.220107	0.0339808	1464
PP471197_rbcR-MZ156038_rbcR		0.00622339	0.0707175	0.0880036	2.34771e-06	954
PP471197_rbcR-MZ156040_rbcR		0.00791157	0.0182804	0.432789	0.192414	954
PP471197_rbcR-NC_070408_rbcR		0.00136695	0.00522344	0.261695	0.307077	954
PP471197_rbcR-NC_085303_rbcR		0.00559056	0.0134833	0.414627	0.252695	888
PP471197_rbcR-ON552965_rbcR		0.0049662	0.00794415	0.625139	0.154817	954
PP471197_rbcS-MZ156038_rbcS		0.00342452	0.0180755	0.189457	0.163424	417
PP471197_rpl11-MZ156038_rpl11		3.46615e-05	0.0346615	0.001	0	423
PP471197_rpl11-MZ156040_rpl11		0.00569392	0.0615275	0.0925426	0.00115319	423
PP471197_rpl11-NC_070408_rpl11		1.84114e-05	0.0184114	0.001	0	423
PP471197_rpl11-NC_085303_rpl11		0.00569392	0.0615275	0.0925426	0.00115319	423
PP471197_rpl11-ON552965_rpl11		0.00569392	0.0615275	0.0925426	0.00115319	423
PP471197_rpl12-MZ156038_rpl12		0.00313684	0.0467672	0.0670736	0	390
PP471197_rpl12-MZ156040_rpl12		0.0031371	0.0473168	0.0663	0	390
PP471197_rpl12-NC_070408_rpl12		1.38709e-05	0.0138709	0.001	0	390
PP471197_rpl12-NC_085303_rpl12		0.00330944	0.0274502	0.120562	0.0877898	390
PP471197_rpl12-ON552965_rpl12		0.00330944	0.0274502	0.120562	0.0877898	390
PP471197_rpl13-MZ156038_rpl13		3.55016e-05	0.0355016	0.001	0	429
PP471197_rpl13-MZ156040_rpl13		1.83911e-05	0.0183911	0.001	0	429
PP471197_rpl14-MZ156038_rpl14		0.00327867	0.0191695	0.171036	0	363
PP471197_rpl14-MZ156040_rpl14		2.45153e-05	0.0245153	0.001	0	363
PP471197_rpl14-NC_070408_rpl14		2.33081e-05	0.0233081	0.001	0	363
PP471197_rpl14-NC_085303_rpl14		2.45153e-05	0.0245153	0.001	0	363
PP471197_rpl14-ON552965_rpl14		2.45153e-05	0.0245153	0.001	0	363
PP471197_rpl16-MZ156038_rpl16		7.27202e-05	0.0727202	0.001	0	402
PP471197_rpl16-MZ156040_rpl16		7.96144e-05	0.0796144	0.001	0	402
PP471197_rpl16-NC_070408_rpl16		2.51696e-05	0.0251696	0.001	0	402
PP471197_rpl16-NC_085303_rpl16		4.57475e-05	0.0457475	0.001	0	402
PP471197_rpl16-ON552965_rpl16		4.57475e-05	0.0457475	0.001	0	402
PP471197_rpl18-MZ156040_rpl18		6.85741e-05	0.0685741	0.001	0	327
PP471197_rpl18-NC_085303_rpl18		6.85741e-05	0.0685741	0.001	0	327
PP471197_rpl18-ON552965_rpl18		6.85741e-05	0.0685741	0.001	0	327
PP471197_rpl19-MZ156040_rpl19		1.80207e-05	0.0180207	0.001	0	384
PP471197_rpl19-NC_085303_rpl19		1.80207e-05	0.0180207	0.001	0	384
PP471197_rpl19-ON552965_rpl19		1.80207e-05	0.0180207	0.001	0	384
PP471197_rpl1-MZ156038_rpl1		4.55764e-05	0.0455764	0.001	0	690
PP471197_rpl1-MZ156040_rpl1		1.83574e-05	0.0183574	0.001	0	690
PP471197_rpl20-MZ156038_rpl20		0.00421821	0.0213113	0.197933	0.155845	342
PP471197_rpl20-MZ156040_rpl20		0.00837834	0.0317881	0.263569	0.120697	342
PP471197_rpl20-NC_070408_rpl20		0.00416835	0.0105178	0.396314	0.390247	342
PP471197_rpl20-NC_085303_rpl20		0.00837834	0.0317881	0.263569	0.120697	342
PP471197_rpl20-ON552965_rpl20		0.00837834	0.0317881	0.263569	0.120697	342
PP471197_rpl21-MZ156038_rpl21		0.0038617	0.0229297	0.168415	0	309
PP471197_rpl21-MZ156040_rpl21		3.98122e-05	0.0398122	0.001	0	309
PP471197_rpl21-NC_085303_rpl21		1.96544e-05	0.0196544	0.001	0	309
PP471197_rpl21-ON552965_rpl21		1.96544e-05	0.0196544	0.001	0	309
PP471197_rpl22-MZ156038_rpl22		0.000145597	0.145597	0.001	0	345
PP471197_rpl22-MZ156040_rpl22		1.93533e-05	0.0193533	0.001	0	345
PP471197_rpl22-NC_085303_rpl22		3.60149e-05	0.0360149	0.001	0	345
PP471197_rpl22-ON552965_rpl22		3.60149e-05	0.0360149	0.001	0	345
PP471197_rpl23-MZ156038_rpl23		1.99403e-05	0.0199403	0.001	0	300
PP471197_rpl23-MZ156040_rpl23		2.01842e-05	0.0201842	0.001	0	300
PP471197_rpl23-NC_085303_rpl23		2.01842e-05	0.0201842	0.001	0	300
PP471197_rpl23-ON552965_rpl23		2.01842e-05	0.0201842	0.001	0	300
PP471197_rpl24-MZ156040_rpl24		0.0211539	0.0194509	1.08755	0.676092	249
PP471197_rpl24-NC_070408_rpl24		3.71566e-05	0.0371566	0.001	0	249
PP471197_rpl24-NC_085303_rpl24		0.0155435	0.0201665	0.77076	0.578964	249
PP471197_rpl24-ON552965_rpl24		0.0155435	0.0201665	0.77076	0.578964	249
PP471197_rpl27-MZ156038_rpl27		4.01565e-05	0.0401565	0.001	0	252
PP471197_rpl27-MZ156040_rpl27		7.56562e-05	0.0756562	0.001	0	252
PP471197_rpl27-NC_070408_rpl27		0.00552039	0.0437221	0.126261	0	252
PP471197_rpl27-NC_085303_rpl27		4.01565e-05	0.0401565	0.001	0	252
PP471197_rpl27-ON552965_rpl27		4.01565e-05	0.0401565	0.001	0	252
PP471197_rpl29-MZ156040_rpl29		3.54278e-05	0.0354278	0.001	0	189
PP471197_rpl29-NC_085303_rpl29		3.54278e-05	0.0354278	0.001	0	189
PP471197_rpl29-ON552965_rpl29		3.54278e-05	0.0354278	0.001	0	189
PP471197_rpl2-MZ156038_rpl2		4.22108e-05	0.0422108	0.001	0	825
PP471197_rpl2-MZ156040_rpl2		0.00133932	0.0359074	0.0372992	0	825
PP471197_rpl2-NC_070408_rpl2		2.44787e-05	0.0244787	0.001	0	825
PP471197_rpl2-NC_085303_rpl2		0.00133932	0.0359074	0.0372992	0	825
PP471197_rpl2-ON552965_rpl2		0.00133932	0.0359074	0.0372992	0	825
PP471197_rpl31-MZ156038_rpl31		2.99062e-05	0.0299062	0.001	0	216
PP471197_rpl31-MZ156040_rpl31		0.00515509	0.0714002	0.0721999	0	216
PP471197_rpl31-NC_085303_rpl31		0.00515509	0.0714002	0.0721999	0	216
PP471197_rpl31-ON552965_rpl31		0.00515509	0.0714002	0.0721999	0	216
PP471197_rpl32-MZ156038_rpl32		5.24363e-05	0.0524363	0.001	0	231
PP471197_rpl32-MZ156040_rpl32		0.00524109	0.0275985	0.189905	0	231
PP471197_rpl32-NC_070408_rpl32		2.60765e-05	0.0260765	0.001	0	219
PP471197_rpl32-NC_085303_rpl32		0.00524109	0.0275985	0.189905	0	231
PP471197_rpl32-ON552965_rpl32		0.00524109	0.0275985	0.189905	0	231
PP471197_rpl33-MZ156038_rpl33		0.00655665	0.0185667	0.353141	0	237
PP471197_rpl36-MZ156038_rpl36		0.000104252	0.104252	0.001	0	111
PP471197_rpl3-MZ156038_rpl3		1.10787e-05	0.0110787	0.001	0	588
PP471197_rpl3-MZ156040_rpl3		0.000105107	0.105107	0.001	0	588
PP471197_rpl3-NC_085303_rpl3		2.12777e-05	0.0212777	0.001	0	588
PP471197_rpl3-ON552965_rpl3		2.12777e-05	0.0212777	0.001	0	588
PP471197_rpl4-MZ156040_rpl4		0.00526651	0.0137131	0.384049	0.0923065	645
PP471197_rpl5-MZ156038_rpl5		1.95393e-05	0.0195393	0.001	0	561
PP471197_rpl5-MZ156040_rpl5		1.20827e-05	0.0120827	0.001	0	561
PP471197_rpl5-NC_070408_rpl5		1.20827e-05	0.0120827	0.001	0	561
PP471197_rpl5-NC_085303_rpl5		1.20827e-05	0.0120827	0.001	0	561
PP471197_rpl5-ON552965_rpl5		1.20827e-05	0.0120827	0.001	0	561
PP471197_rpl6-MZ156038_rpl6		0.00391496	0.0319879	0.122389	0.0201774	534
PP471197_rpl6-MZ156040_rpl6		0.00193635	0.0324401	0.05969	0	534
PP471197_rpl6-NC_070408_rpl6		1.22787e-05	0.0122787	0.001	0	534
PP471197_rpl6-NC_085303_rpl6		0.00193635	0.0324401	0.05969	0	534
PP471197_rpl6-ON552965_rpl6		0.00193635	0.0324401	0.05969	0	534
PP471197_rpoA-MZ156038_rpoA		0.00403861	0.0431781	0.0935339	7.60668e-05	1065
PP471197_rpoA-MZ156040_rpoA		0.00226948	0.0460439	0.0492896	9.29951e-07	1065
PP471197_rpoA-NC_070408_rpoA		0.00239932	0.00951335	0.252205	0.174085	1065
PP471197_rpoA-NC_085303_rpoA		0.00223004	0.0354447	0.0629159	2.31062e-05	1065
PP471197_rpoA-ON552965_rpoA		0.00223004	0.0354447	0.0629159	2.31062e-05	1065
PP471197_rpoB-MZ156038_rpoB		0.00084266	0.0452575	0.0186192	2.77991e-18	3396
PP471197_rpoB-MZ156040_rpoB		0.000631278	0.0547291	0.0115346	3.2374e-22	3396
PP471197_rpoB-NC_070408_rpoB		0.000313375	0.0199866	0.0156793	0	3396
PP471197_rpoB-NC_085303_rpoB		0.000990776	0.0449625	0.0220356	4.09287e-18	3396
PP471197_rpoB-ON552965_rpoB		0.000990776	0.0449625	0.0220356	4.09287e-18	3396
PP471197_rpoC1-MZ156038_rpoC1		0.00124749	0.0459025	0.027177	1.73943e-10	1830
PP471197_rpoC1-MZ156040_rpoC1		3.88639e-05	0.0388639	0.001	0	1830
PP471197_rpoC1-NC_070408_rpoC1		3.63461e-06	0.00363461	0.001	0	1830
PP471197_rpoC1-NC_085303_rpoC1		0.00062295	0.0378384	0.0164634	0	1830
PP471197_rpoC1-ON552965_rpoC1		0.00062295	0.0378384	0.0164634	0	1830
PP471197_rpoC2-MZ156038_rpoC2		0.00189185	0.0331424	0.0570826	3.78769e-11	3834
PP471197_rpoC2-MZ156040_rpoC2		0.00211314	0.0465455	0.0453995	8.73517e-17	3834
PP471197_rpoC2-NC_070408_rpoC2		0.0014557	0.0177697	0.0819205	1.46396e-06	3834
PP471197_rpoC2-NC_085303_rpoC2		0.00240594	0.0426992	0.0563463	1.20922e-14	3834
PP471197_rpoC2-ON552965_rpoC2		0.00214576	0.039995	0.0536508	1.18794e-14	3834
PP471197_rps10-MZ156038_rps10		3.5523e-05	0.035523	0.001	0	318
PP471197_rps10-MZ156040_rps10		8.19886e-05	0.0819886	0.001	0	318
PP471197_rps10-NC_085303_rps10		8.19886e-05	0.0819886	0.001	0	318
PP471197_rps10-ON552965_rps10		8.19886e-05	0.0819886	0.001	0	318
PP471197_rps11-MZ156038_rps11		0.00335207	0.0308788	0.108556	0	369
PP471197_rps11-MZ156040_rps11		0.00679756	0.0301566	0.225409	0.0217802	369
PP471197_rps11-NC_085303_rps11		0.0101729	0.0152513	0.667016	0.159087	369
PP471197_rps11-ON552965_rps11		0.0101729	0.0152513	0.667016	0.159087	369
PP471197_rps12-MZ156038_rps12		6.38893e-05	0.0638893	0.001	0	372
PP471197_rps12-MZ156040_rps12		3.08189e-05	0.0308189	0.001	0	372
PP471197_rps12-NC_070408_rps12		1.51186e-05	0.0151186	0.001	0	372
PP471197_rps12-NC_085303_rps12		3.08189e-05	0.0308189	0.001	0	372
PP471197_rps12-ON552965_rps12		3.08189e-05	0.0308189	0.001	0	372
PP471197_rps13-MZ156038_rps13		1.745e-05	0.01745	0.001	0	378
PP471197_rps13-MZ156040_rps13		1.85393e-05	0.0185393	0.001	0	378
PP471197_rps13-NC_085303_rps13		1.85393e-05	0.0185393	0.001	0	378
PP471197_rps13-ON552965_rps13		1.85393e-05	0.0185393	0.001	0	378
PP471197_rps14-MZ156040_rps14		0.00424686	0.0152861	0.277826	0	300
PP471197_rps14-NC_085303_rps14		0.00424686	0.0152861	0.277826	0	300
PP471197_rps14-ON552965_rps14		0.00424686	0.0152861	0.277826	0	300
PP471197_rps18-MZ156040_rps18		0.00963306	0.0334094	0.288334	0.0463763	243
PP471197_rps18-NC_085303_rps18		0.00479428	0.0335871	0.142742	0	243
PP471197_rps18-ON552965_rps18		0.00479428	0.0335871	0.142742	0	243
PP471197_rps19-MZ156038_rps19		0.00401115	0.181568	0.0220918	0	282
PP471197_rps19-MZ156040_rps19		0.0042131	0.0514249	0.0819271	0	282
PP471197_rps19-NC_070408_rps19		2.23853e-05	0.0223853	0.001	0	282
PP471197_rps19-NC_085303_rps19		0.0042131	0.0514249	0.0819271	0	282
PP471197_rps19-ON552965_rps19		0.0042131	0.0514249	0.0819271	0	282
PP471197_rps1-MZ156038_rps1		0.00637506	0.0268818	0.237152	0.012736	795
PP471197_rps1-MZ156040_rps1		0.00923293	0.0275911	0.334635	0.0423951	795
PP471197_rps1-NC_070408_rps1		0.00361073	0.0107788	0.334985	0.247978	795
PP471197_rps1-NC_085303_rps1		0.00923293	0.0275911	0.334635	0.0423951	795
PP471197_rps1-ON552965_rps1		0.00923293	0.0275911	0.334635	0.0423951	795
PP471197_rps20-MZ156038_rps20		0.0181079	0.0293907	0.616108	0.38856	303
PP471197_rps20-MZ156040_rps20		0.00390991	0.0746792	0.0523561	0	303
PP471197_rps20-NC_085303_rps20		0.00365559	0.0399239	0.091564	0	303
PP471197_rps20-ON552965_rps20		0.00365559	0.0399239	0.091564	0	303
PP471197_rps2-MZ156038_rps2		3.23641e-05	0.0323641	0.001	0	693
PP471197_rps2-MZ156040_rps2		3.70178e-05	0.0370178	0.001	0	693
PP471197_rps2-NC_085303_rps2		5.12518e-05	0.0512518	0.001	0	693
PP471197_rps2-ON552965_rps2		5.12518e-05	0.0512518	0.001	0	693
PP471197_rps3-MZ156038_rps3		1.90255e-05	0.0190255	0.001	0	666
PP471197_rps3-MZ156040_rps3		0.00181791	0.00977495	0.185976	0	666
PP471197_rps3-NC_070408_rps3		9.50868e-06	0.00950868	0.001	0	666
PP471197_rps3-NC_085303_rps3		0.0036405	0.00976968	0.372632	0.397728	666
PP471197_rps3-ON552965_rps3		0.0036405	0.00976968	0.372632	0.397728	666
PP471197_rps4-MZ156038_rps4		4.75965e-05	0.0475965	0.001	0	630
PP471197_rps4-MZ156040_rps4		1.01456e-05	0.0101456	0.001	0	630
PP471197_rps4-NC_070408_rps4		0.00210557	0.00744805	0.282701	0.320629	630
PP471197_rps4-NC_085303_rps4		1.56781e-05	0.0156781	0.001	0	630
PP471197_rps4-ON552965_rps4		0.0040676	0.0246336	0.165124	0.0490227	630
PP471197_rps5-MZ156038_rps5		0.00247259	0.0367486	0.067284	0	501
PP471197_rps5-MZ156040_rps5		3.06463e-05	0.0306463	0.001	0	501
PP471197_rps5-NC_070408_rps5		4.06563e-05	0.0406563	0.001	0	501
PP471197_rps5-NC_085303_rps5		4.00712e-05	0.0400712	0.001	0	501
PP471197_rps5-ON552965_rps5		4.00712e-05	0.0400712	0.001	0	501
PP471197_rps7-MZ156038_rps7		2.57074e-05	0.0257074	0.001	0	468
PP471197_rps7-MZ156040_rps7		0.00255361	0.0144033	0.177293	0	468
PP471197_rps7-NC_070408_rps7		1.29623e-05	0.0129623	0.001	0	468
PP471197_rps7-NC_085303_rps7		0.00255361	0.0144033	0.177293	0	468
PP471197_rps7-ON552965_rps7		0.00255361	0.0144033	0.177293	0	468
PP471197_rps8-MZ156038_rps8		1.61265e-05	0.0161265	0.001	0	396
PP471197_rps8-MZ156040_rps8		3.04263e-05	0.0304263	0.001	0	396
PP471197_rps8-NC_085303_rps8		1.61265e-05	0.0161265	0.001	0	396
PP471197_rps8-ON552965_rps8		1.61265e-05	0.0161265	0.001	0	396
PP471197_rps9-MZ156040_rps9		8.90955e-05	0.0890955	0.001	0	426
PP471197_rps9-NC_085303_rps9		1.952e-05	0.01952	0.001	0	426
PP471197_rps9-ON552965_rps9		1.952e-05	0.01952	0.001	0	426
PP471197_secA-MZ156038_secA		0.00149421	0.0611278	0.024444	1.31921e-12	2631
PP471197_secA-MZ156040_secA		0.00310996	0.0283517	0.109692	2.99511e-06	2631
PP471197_secA-NC_070408_secA		0.00233358	0.00480934	0.485217	0.302732	2631
PP471197_secA-NC_085303_secA		0.00305073	0.0328864	0.0927659	4.41878e-07	2631
PP471197_secA-ON552965_secA		0.00311008	0.0283847	0.109569	2.99659e-06	2631
PP471197_secY-MZ156038_secY		0.00174652	0.00968729	0.180289	0.0213948	1293
PP471197_secY-MZ156040_secY		0.000818377	0.0141338	0.057902	0	1293
PP471197_secY-NC_070408_secY		6.27052e-06	0.00627052	0.001	0	1293
PP471197_secY-NC_085303_secY		1.71988e-05	0.0171988	0.001	0	1293
PP471197_secY-ON552965_secY		2.25283e-05	0.0225283	0.001	0	1293
PP471197_syfB-MZ156038_syfB		0.00735697	0.0186312	0.394874	0.0227856	2301
PP471197_syfB-MZ156040_syfB		0.00422409	0.0155227	0.272124	0.00857715	2301
PP471197_syfB-NC_070408_syfB		0.00359777	0.00308414	1.16654	0.364865	2301
PP471197_syfB-NC_085303_syfB		0.00266603	0.0137519	0.193866	0.00361821	2301
PP471197_syfB-ON552965_syfB		0.00266603	0.0137519	0.193866	0.00361821	2301
PP471197_tatC-MZ156038_tatC		0.00359599	0.0184389	0.195022	0.0662102	780
PP471197_tatC-MZ156040_tatC		0.00157341	0.00751649	0.209328	0	780
PP471197_thiG-MZ156038_thiG		0.00138264	0.0222128	0.0622453	0	816
PP471197_thiG-MZ156040_thiG		0.00141359	0.0282979	0.0499538	0	816
PP471197_thiG-NC_070408_thiG		6.77454e-06	0.00677454	0.001	0	816
PP471197_thiG-NC_085303_thiG		1.71628e-05	0.0171628	0.001	0	816
PP471197_thiG-ON552965_thiG		1.71628e-05	0.0171628	0.001	0	816
PP471197_tsf-MZ156038_tsf		0.000109799	0.109799	0.001	0	600
PP471197_tsf-MZ156040_tsf		7.40952e-05	0.0740952	0.001	0	600
PP471197_tsf-NC_070408_tsf		0.00179141	0.0371127	0.0482695	0	600
PP471197_tsf-NC_085303_tsf		7.40952e-05	0.0740952	0.001	0	600
PP471197_tsf-ON552965_tsf		7.40952e-05	0.0740952	0.001	0	600
PP471197_tufA-MZ156038_tufA		2.82278e-05	0.0282278	0.001	0	1230
PP471197_tufA-MZ156040_tufA		3.06006e-05	0.0306006	0.001	0	1230
PP471197_tufA-NC_085303_tufA		2.36565e-05	0.0236565	0.001	0	1230
PP471197_tufA-ON552965_tufA		2.36565e-05	0.0236565	0.001	0	1230
PP471197_ycf16-MZ156038_ycf16		0.00451643	0.0590179	0.0765264	4.28645e-05	774
PP471197_ycf16-MZ156040_ycf16		0.00295988	0.031067	0.0952741	0.0019373	774
PP471197_ycf16-NC_085303_ycf16		0.00290547	0.0227073	0.127953	0.00939634	774
PP471197_ycf16-ON552965_ycf16		0.00290547	0.0227073	0.127953	0.00939634	774
PP471197_ycf19-MZ156038_ycf19		0.00348256	0.0473123	0.0736079	0	357
PP471197_ycf19-MZ156040_ycf19		3.61871e-05	0.0361871	0.001	0	357
PP471197_ycf19-NC_085303_ycf19		1.20342e-05	0.0120342	0.001	0	357
PP471197_ycf19-ON552965_ycf19		1.20342e-05	0.0120342	0.001	0	357
PP471197_ycf24-MZ156038_ycf24		0.00242298	0.05038	0.048094	2.0027e-08	1443
PP471197_ycf24-MZ156040_ycf24		0.00164471	0.0221028	0.0744118	0.000121032	1443
PP471197_ycf24-NC_070408_ycf24		0.000836065	0.0170239	0.0491113	0	1443
PP471197_ycf24-NC_085303_ycf24		0.00162084	0.0181854	0.0891286	0.00056627	1443
PP471197_ycf24-ON552965_ycf24		0.00162084	0.0181854	0.0891286	0.00056627	1443
PP471197_ycf34-MZ156038_ycf34		0.00765073	0.109512	0.069862	0.0017089	282
PP471197_ycf34-MZ156040_ycf34		0.0123184	0.086438	0.142511	0.00425227	282
PP471197_ycf34-NC_085303_ycf34		0.00788809	0.135558	0.0581896	0.000265171	282
PP471197_ycf34-ON552965_ycf34		0.00788809	0.135558	0.0581896	0.000265171	282
PP471197_ycf35-MZ156038_ycf35		2.06405e-05	0.0206405	0.001	0	402
PP471197_ycf35-MZ156040_ycf35		4.08752e-05	0.0408752	0.001	0	402
PP471197_ycf35-NC_085303_ycf35		4.08752e-05	0.0408752	0.001	0	402
PP471197_ycf35-ON552965_ycf35		4.08752e-05	0.0408752	0.001	0	402
PP471197_ycf37-MZ156038_ycf37		0.00808781	0.123427	0.0655269	1.27224e-05	537
PP471197_ycf37-MZ156040_ycf37		0.00736409	0.0198017	0.371893	0.0602752	537
PP471197_ycf37-NC_070408_ycf37		9.26534e-05	0.0926534	0.001	0	537
PP471197_ycf37-NC_085303_ycf37		0.0074961	0.0285745	0.262335	0.0215835	537
PP471197_ycf37-ON552965_ycf37		0.0074961	0.0285745	0.262335	0.0215835	537
PP471197_ycf39-MZ156038_ycf39		2.02611e-05	0.0202611	0.001	0	957
PP471197_ycf39-MZ156040_ycf39		3.42014e-05	0.0342014	0.001	0	957
PP471197_ycf39-NC_085303_ycf39		1.33382e-05	0.0133382	0.001	0	957
PP471197_ycf39-ON552965_ycf39		1.33382e-05	0.0133382	0.001	0	957
PP471197_ycf40-MZ156038_ycf40		4.76746e-05	0.0476746	0.001	0	225
PP471197_ycf40-MZ156040_ycf40		0.00482631	0.115565	0.0417627	0	225
PP471197_ycf41-MZ156038_ycf41		2.78465e-05	0.0278465	0.001	0	297
PP471197_ycf42-MZ156038_ycf42		2.70101e-05	0.0270101	0.001	0	558
PP471197_ycf42-MZ156040_ycf42		1.3602e-05	0.013602	0.001	0	558
PP471197_ycf42-NC_085303_ycf42		1.3602e-05	0.013602	0.001	0	558
PP471197_ycf42-ON552965_ycf42		1.3602e-05	0.013602	0.001	0	558
PP471197_ycf46-MZ156038_ycf46		2.11649e-05	0.0211649	0.001	0	1473
PP471197_ycf46-MZ156040_ycf46		0.000860587	0.0122699	0.0701381	0.0142738	1473
PP471197_ycf46-NC_070408_ycf46		4.42286e-06	0.00442286	0.001	0	1473
PP471197_ycf46-NC_085303_ycf46		0.000859916	0.0124343	0.0691567	0.013721	1473
PP471197_ycf46-ON552965_ycf46		0.000859916	0.0124343	0.0691567	0.013721	1473
PP471197_ycf47-MZ156038_ycf47		5.74025e-05	0.0574025	0.001	0	228
PP471197_ycf47-MZ156040_ycf47		0.00550702	0.0260778	0.211177	0.285966	228
PP471197_ycf47-NC_070408_ycf47		2.09904e-05	0.0209904	0.001	0	228
PP471197_ycf47-NC_085303_ycf47		2.09904e-05	0.0209904	0.001	0	228
PP471197_ycf47-ON552965_ycf47		2.09904e-05	0.0209904	0.001	0	228
PP471197_ycf65-MZ156038_ycf65		1.97077e-05	0.0197077	0.001	0	318
PP471197_ycf65-MZ156040_ycf65		5.52935e-05	0.0552935	0.001	0	318
PP471197_ycf65-NC_070408_ycf65		1.97077e-05	0.0197077	0.001	0	318
PP471197_ycf65-NC_085303_ycf65		5.52935e-05	0.0552935	0.001	0	318
PP471197_ycf65-ON552965_ycf65		5.52935e-05	0.0552935	0.001	0	318
PP471197_ycf66-MZ156038_ycf66		2.98859e-05	0.0298859	0.001	0	321
PP471197_ycf66-MZ156040_ycf66		4.46037e-05	0.0446037	0.001	0	321
PP471197_ycf66-NC_070408_ycf66		2.98859e-05	0.0298859	0.001	0	321
PP471197_ycf66-NC_085303_ycf66		4.53456e-05	0.0453456	0.001	0	321
PP471197_ycf66-ON552965_ycf66		4.53456e-05	0.0453456	0.001	0	321
