# Supplementary material for: Chloroplast genome sequencing and evolutionary analysis of Ecklonia maxima and its comparison and phylogenetic analysis with its close relatives
Source: Research Square preprint supplement (doi:10.21203/rs.3.rs-7481212/v1), 2025-10-08
Supplement: Supplementary file 2 [file 68867684529b2d7c2710a6c0.xlsx]

## Sheet: Table S4. all.fa.cod.result
Table s4:The PI value of Ecklonia maxima
Gene	Length	S	Eta	Pi	Theta
1-ycf37-exon1	318	6	6	0.0077568	0.0082633
2-psaM	93	0	0	0	0
3-chlI	1023	15	15	0.0053438	0.0064216
4-trnF-GAA	73	0	0	0	0
5-petB	648	6	6	0.0034979	0.0040552
6-petD	483	3	3	0.0024845	0.0027202
7-atpA	1506	12	12	0.0033201	0.0034897
8-atpD	618	10	10	0.0058252	0.0070867
9-atpF	525	3	3	0.0019048	0.0025026
10-atpG	471	8	8	0.0072187	0.0074387
11-atpH	249	0	0	0	0
12-atpI	747	5	5	0.0022311	0.0029314
13-tsf	603	5	5	0.0030956	0.0036315
14-rps2	696	6	6	0.0041188	0.0037755
15-rpoC2	3837	50	51	0.0057858	0.0058212
16-rpoC1	1833	24	24	0.0057465	0.0057343
17-rpoB	3399	51	51	0.0064725	0.0065713
18-rps20	301	9	9	0.0108527	0.013095
19-trnS-UGA	88	1	1	0.0060606	0.0049768
20-psaD	399	11	11	0.0108605	0.012074
21-trnM-CAU	76	0	0	0	0
22-trnP-UGG	74	0	0	0	0
23-chlB	1533	17	17	0.0048706	0.0048567
24-trnY-GUA	81	0	0	0	0
25-cp30	696	13	13	0.0076628	0.0081802
26-ccs1	1287	16	16	0.00518	0.0054447
27-ycf46	1476	10	10	0.0029359	0.0029672
28-rpl34	138	0	0	0	0
29-secA	2634	38	38	0.0062516	0.0063183
30-ycf54	381	9	9	0.0090989	0.0103454
31-thiG	819	9	9	0.0042328	0.0048127
32-trnG-GCC	72	0	0	0	0
33-psbI	126	0	0	0	0
34-dnaK	1893	27	27	0.0058109	0.0062466
35-trnS-GCU	90	0	0	0	0
36-trnM-CAU	73	0	0	0	0
37-trnD-GUC	75	0	0	0	0
38-groEL	1539	23	23	0.0059779	0.0065452
39-petJ	333	12	13	0.0152152	0.0170974
40-psbV	486	7	7	0.0061728	0.006308
41-ycf66	324	4	4	0.0047325	0.0054069
42-psbX	132	2	2	0.0050505	0.0066357
43-rpl27	255	4	4	0.0052288	0.0068699
44-rpl19	387	1	1	0.0015504	0.0011317
45-trnM-CAU	86	1	1	0.0069767	0.0050925
46-ycf47	231	3	3	0.004329	0.0056877
47-petM	99	1	1	0.003367	0.0044238
48-petN	90	0	0	0	0
49-acsF	1101	10	10	0.003512	0.0039778
50-ycf42	561	3	3	0.0022579	0.002342
51-rpl35	195	0	0	0	0
52-rpl20	345	5	5	0.0069565	0.0063472
53-ilvH	603	6	6	0.0040907	0.0043578
54-ycf34	285	7	7	0.011462	0.0107568
55-trnL-UAA-exon2	44	0	0	0	0
56-trnL-UAA-exon1	37	0	0	0	0
57-trnC-GCA	73	0	0	0	0
58-rbcL	1464	13	14	0.003643	0.0041881
59-rbcS	415	5	5	0.004498	0.0052766
60-trnR-UCU	74	0	0	0	0
61-trnE-UUC	73	0	0	0	0
62-psaA	2250	23	23	0.0041185	0.0044769
63-psaB	2205	14	15	0.0029932	0.0029793
64-rps14	303	2	2	0.0030803	0.0028908
65-petG	114	0	0	0	0
66-psbK	135	0	0	0	0
67-ccsA	987	10	10	0.0038501	0.0044372
68-chlL	885	10	10	0.0042185	0.0049487
69-chlN	1359	8	8	0.0023056	0.0025781
70-psaF	609	8	8	0.0061303	0.0057531
71-psaJ	129	1	1	0.002584	0.003395
72-cp74	1569	32	32	0.0092203	0.0089322
73-petA	948	14	14	0.0068214	0.0064677
74-tatC	783	9	9	0.0038314	0.005034
75-atpE	405	7	7	0.0064198	0.0075696
76-atpB	1446	8	8	0.0024896	0.002423
77-pafI	510	5	5	0.003268	0.0042937
78-rps18	246	3	3	0.0059621	0.0053409
79-rpl33	240	7	7	0.0097222	0.0127737
80-clpC	2679	29	29	0.0042553	0.0047408
81-trnK-UUU	74	0	0	0	0
82-psaC	246	1	1	0.001355	0.0017803
83-psbA	1086	1	1	0.0003069	0.0004033
84-cbbx	903	6	6	0.0031746	0.00291
85-psb30	96	0	0	0	0
86-ftrB	348	2	2	0.0019157	0.002517
87-psaI	123	2	2	0.0054201	0.0071212
88-psbJ	120	2	2	0.0077778	0.0072993
89-psbL	117	1	1	0.0051282	0.0037432
90-psbF	132	2	2	0.0080808	0.0066357
91-psbE	255	1	1	0.0023529	0.0017175
92-trnG-UCC	71	0	0	0	0
93-pafII	561	8	8	0.0065359	0.0062454
94-psaL	438	13	13	0.0126332	0.0129987
95-rbcR	957	20	20	0.0078718	0.0091527
96-psbY	114	0	0	0	0
97-rpl32	283	9	9	0.011543	0.0139279
98-trnL-UAG	83	0	0	0	0
99-rns	1480	1	1	0.0002252	0.0002959
100-trnI-GAU	74	1	1	0.0081081	0.0059183
101-trnA-UGC	75	0	0	0	0
102-rnl	2945	12	12	0.0014261	0.0017845
103-rrn5	116	1	1	0.0028736	0.0037755
104-rpl21	312	3	3	0.0038462	0.0042111
105-rpl3	591	5	5	0.0032713	0.0037052
106-rpl4	648	4	4	0.0028807	0.0027034
107-rpl23	303	2	2	0.0030803	0.0028908
108-rpl2	828	6	6	0.0029791	0.0031736
109-rps19	285	5	5	0.0074854	0.0076834
110-rpl22	348	6	6	0.0070881	0.007551
111-rps3	669	4	4	0.0026906	0.0026186
112-rpl16	405	7	7	0.0064198	0.0075696
113-rpl29	192	1	1	0.003125	0.002281
114-rps17	255	0	0	0	0
115-rpl14	366	3	3	0.0032787	0.0035898
116-rpl24	252	7	7	0.0132275	0.0121655
117-rpl5	564	2	2	0.001182	0.001553
118-rps8	399	2	2	0.0021721	0.0021953
119-rpl6	537	5	5	0.0040968	0.0040778
120-rpl18	330	3	3	0.0044444	0.0039814
121-rps5	504	8	8	0.0062169	0.0069517
122-secY	1296	9	9	0.0028807	0.0030414
123-rpl36	114	1	1	0.002924	0.0038417
124-rps13	381	2	2	0.0029746	0.002299
125-rps11	372	7	7	0.0082437	0.0082411
126-rpoA	1068	20	20	0.0076779	0.0082014
127-rpl13	432	3	3	0.0023148	0.0030414
128-rps9	429	2	2	0.0021756	0.0020418
129-rpl31	219	3	3	0.0070015	0.0059994
130-rps12	375	4	4	0.0040889	0.0046715
131-rps7	471	3	3	0.0026893	0.0027895
132-tufA	1233	13	13	0.0044336	0.0046175
133-rps10	321	4	4	0.0070613	0.0054574
134-psaE	186	7	7	0.0139785	0.0164822
135-ftsH	1887	12	12	0.0022258	0.0027851
136-psbH	204	0	0	0	0
137-pbf1	132	0	0	0	0
138-psbT	126	1	1	0.0026455	0.0034758
139-psbB	1533	8	9	0.0022179	0.0025712
140-petF	294	24	25	0.038322	0.0372412
141-rpl12	393	6	6	0.0062765	0.0066864
142-rpl1	693	7	7	0.003367	0.0044238
143-rpl11	426	6	6	0.0071987	0.0061684
144-trnW-CCA	73	0	0	0	0
145-dnaB	1452	20	20	0.0056933	0.0060325
146-rpl9	468	1	1	0.0007123	0.0009358
147-psbW	345	3	3	0.0028986	0.0038083
148-syfB	2304	31	31	0.0051215	0.0058926
149-rps1	798	11	11	0.0061821	0.006037
150-ycf40	228	4	4	0.005848	0.0076834
151-trnH-GUG	74	0	0	0	0
152-trnT-UGU	73	0	0	0	0
153-trnV-UAC	72	0	0	0	0
154-trnR-UCU	73	1	1	0.0045662	0.0059994
155-ycf35	405	2	2	0.0027984	0.0021627
156-ycf24	1446	16	17	0.0044721	0.0051489
157-ycf16	777	11	11	0.005577	0.0062002
158-trnN-GUU	73	0	0	0	0
159-psbD	1056	8	8	0.0027146	0.0033179
160-psbC	1425	12	12	0.0039766	0.0036881
161-ycf41	300	2	2	0.0028889	0.0029197
162-ycf39	960	6	6	0.0025694	0.0027372
163-ycf33	195	2	2	0.0047863	0.0044919
164-ilvB	2169	22	22	0.0047334	0.0044422
165-rps4	633	8	8	0.0045287	0.005535
166-trnR-ACG	74	0	0	0	0
167-trnQ-UUG	74	0	0	0	0
168-ycf65	321	3	3	0.003946	0.004093
169-rps16	234	1	1	0.0014245	0.0018716
170-ycf19	360	7	7	0.007037	0.0085158
171-ycf17	170	1	1	0.0031373	0.0025762
172-rrn5	115	1	1	0.0028986	0.0038083
173-rnl	2944	12	12	0.0014266	0.0017851
174-trnA-UGC	74	0	0	0	0
175-trnI-GAU	73	1	1	0.0082192	0.0059994
176-rns	1479	1	1	0.0002254	0.0002961
177-ycf37-exon2	220	8	8	0.0157576	0.0159257
