# Supplementary material for: Chloroplast genome sequencing and evolutionary analysis of Ecklonia maxima and its comparison and phylogenetic analysis with its close relatives
Source: Research Square preprint supplement (doi:10.21203/rs.3.rs-7481212/v1), 2025-10-08
Supplement: Supplementary file 3 [file 764c903082c3b61d62be41f0.xlsx]

## Sheet: kegg.category
Table S2:KEGG category analysis of E.maxima cp genome
Gene	Entry	Category1	Category2	Category3	Pathway	Description
psaM	K02700	1. Metabolism	1.2 Energy metabolism	Photosynthesis	ko00195	psaM; photosystem I subunit XII
chlI	K03405	1. Metabolism	1.8 Metabolism of cofactors and vitamins	Porphyrin and chlorophyll metabolism	ko00860	chlI, bchI; magnesium chelatase subunit I [EC:6.6.1.1]
chlI	K03405	1. Metabolism	1.0 Global and overview maps	Metabolic pathways	ko01100	chlI, bchI; magnesium chelatase subunit I [EC:6.6.1.1]
chlI	K03405	1. Metabolism	1.0 Global and overview maps	Biosynthesis of secondary metabolites	ko01110	chlI, bchI; magnesium chelatase subunit I [EC:6.6.1.1]
petB	K02635	1. Metabolism	1.2 Energy metabolism	Photosynthesis	ko00195	petB; cytochrome b6
petB	K02635	1. Metabolism	1.0 Global and overview maps	Metabolic pathways	ko01100	petB; cytochrome b6
petD	K02637	1. Metabolism	1.2 Energy metabolism	Photosynthesis	ko00195	petD; cytochrome b6-f complex subunit 4
petD	K02637	1. Metabolism	1.0 Global and overview maps	Metabolic pathways	ko01100	petD; cytochrome b6-f complex subunit 4
atpA	K02111	1. Metabolism	1.2 Energy metabolism	Oxidative phosphorylation	ko00190	ATPF1A, atpA; F-type H+/Na+-transporting ATPase subunit alpha [EC:7.1.2.2 7.2.2.1]
atpA	K02111	1. Metabolism	1.2 Energy metabolism	Photosynthesis	ko00195	ATPF1A, atpA; F-type H+/Na+-transporting ATPase subunit alpha [EC:7.1.2.2 7.2.2.1]
atpA	K02111	1. Metabolism	1.0 Global and overview maps	Metabolic pathways	ko01100	ATPF1A, atpA; F-type H+/Na+-transporting ATPase subunit alpha [EC:7.1.2.2 7.2.2.1]
atpD	K02113	1. Metabolism	1.2 Energy metabolism	Oxidative phosphorylation	ko00190	ATPF1D, atpH; F-type H+-transporting ATPase subunit delta
atpD	K02113	1. Metabolism	1.2 Energy metabolism	Photosynthesis	ko00195	ATPF1D, atpH; F-type H+-transporting ATPase subunit delta
atpD	K02113	1. Metabolism	1.0 Global and overview maps	Metabolic pathways	ko01100	ATPF1D, atpH; F-type H+-transporting ATPase subunit delta
atpG	K02109	1. Metabolism	1.2 Energy metabolism	Oxidative phosphorylation	ko00190	ATPF0B, atpF; F-type H+-transporting ATPase subunit b
atpG	K02109	1. Metabolism	1.2 Energy metabolism	Photosynthesis	ko00195	ATPF0B, atpF; F-type H+-transporting ATPase subunit b
atpG	K02109	1. Metabolism	1.0 Global and overview maps	Metabolic pathways	ko01100	ATPF0B, atpF; F-type H+-transporting ATPase subunit b
atpH	K02110	1. Metabolism	1.2 Energy metabolism	Oxidative phosphorylation	ko00190	ATPF0C, atpE; F-type H+-transporting ATPase subunit c
atpH	K02110	1. Metabolism	1.2 Energy metabolism	Photosynthesis	ko00195	ATPF0C, atpE; F-type H+-transporting ATPase subunit c
atpH	K02110	1. Metabolism	1.0 Global and overview maps	Metabolic pathways	ko01100	ATPF0C, atpE; F-type H+-transporting ATPase subunit c
atpI	K02108	1. Metabolism	1.2 Energy metabolism	Oxidative phosphorylation	ko00190	ATPF0A, atpB; F-type H+-transporting ATPase subunit a
atpI	K02108	1. Metabolism	1.2 Energy metabolism	Photosynthesis	ko00195	ATPF0A, atpB; F-type H+-transporting ATPase subunit a
atpI	K02108	1. Metabolism	1.0 Global and overview maps	Metabolic pathways	ko01100	ATPF0A, atpB; F-type H+-transporting ATPase subunit a
rps2	K02967	2. Genetic Information Processing	2.2 Translation	Ribosome	ko03010	RP-S2, MRPS2, rpsB; small subunit ribosomal protein S2
rpoC2	K03046	2. Genetic Information Processing	2.1 Transcription	RNA polymerase	ko03020	rpoC; DNA-directed RNA polymerase subunit beta' [EC:2.7.7.6]
rpoC1	K03046	2. Genetic Information Processing	2.1 Transcription	RNA polymerase	ko03020	rpoC; DNA-directed RNA polymerase subunit beta' [EC:2.7.7.6]
rpoB	K03043	2. Genetic Information Processing	2.1 Transcription	RNA polymerase	ko03020	rpoB; DNA-directed RNA polymerase subunit beta [EC:2.7.7.6]
rps20	K02968	2. Genetic Information Processing	2.2 Translation	Ribosome	ko03010	RP-S20, rpsT; small subunit ribosomal protein S20
psaD	K02692	1. Metabolism	1.2 Energy metabolism	Photosynthesis	ko00195	psaD; photosystem I subunit II
psaD	K02692	1. Metabolism	1.0 Global and overview maps	Metabolic pathways	ko01100	psaD; photosystem I subunit II
chlB	K04039	1. Metabolism	1.8 Metabolism of cofactors and vitamins	Porphyrin and chlorophyll metabolism	ko00860	chlB; light-independent protochlorophyllide reductase subunit B [EC:1.3.7.7]
chlB	K04039	1. Metabolism	1.0 Global and overview maps	Metabolic pathways	ko01100	chlB; light-independent protochlorophyllide reductase subunit B [EC:1.3.7.7]
chlB	K04039	1. Metabolism	1.0 Global and overview maps	Biosynthesis of secondary metabolites	ko01110	chlB; light-independent protochlorophyllide reductase subunit B [EC:1.3.7.7]
rpl34	K02914	2. Genetic Information Processing	2.2 Translation	Ribosome	ko03010	RP-L34, MRPL34, rpmH; large subunit ribosomal protein L34
secA	K03070	4. Cellular Processes	4.4 Cellular community - prokaryotes	Quorum sensing	ko02024	secA; preprotein translocase subunit SecA [EC:7.4.2.8]
secA	K03070	2. Genetic Information Processing	2.3 Folding, sorting and degradation	Protein export	ko03060	secA; preprotein translocase subunit SecA [EC:7.4.2.8]
secA	K03070	3. Environmental Information Processing	3.1 Membrane transport	Bacterial secretion system	ko03070	secA; preprotein translocase subunit SecA [EC:7.4.2.8]
thiG	K03149	1. Metabolism	1.8 Metabolism of cofactors and vitamins	Thiamine metabolism	ko00730	thiG; thiazole synthase [EC:2.8.1.10]
thiG	K03149	1. Metabolism	1.0 Global and overview maps	Metabolic pathways	ko01100	thiG; thiazole synthase [EC:2.8.1.10]
psbI	K02710	1. Metabolism	1.2 Energy metabolism	Photosynthesis	ko00195	psbI; photosystem II PsbI protein
dnaK	K04043	2. Genetic Information Processing	2.3 Folding, sorting and degradation	RNA degradation	ko03018	dnaK, HSPA9; molecular chaperone DnaK
dnaK	K04043	5. Organismal Systems	5.9 Aging	Longevity regulating pathway - worm	ko04212	dnaK, HSPA9; molecular chaperone DnaK
dnaK	K04043	6. Human Diseases	6.8 Infectious disease: bacterial	Tuberculosis	ko05152	dnaK, HSPA9; molecular chaperone DnaK
groEL	K04077	2. Genetic Information Processing	2.3 Folding, sorting and degradation	RNA degradation	ko03018	groEL, HSPD1; chaperonin GroEL
groEL	K04077	5. Organismal Systems	5.9 Aging	Longevity regulating pathway - worm	ko04212	groEL, HSPD1; chaperonin GroEL
groEL	K04077	6. Human Diseases	6.7 Endocrine and metabolic disease	Type I diabetes mellitus	ko04940	groEL, HSPD1; chaperonin GroEL
groEL	K04077	6. Human Diseases	6.8 Infectious disease: bacterial	Legionellosis	ko05134	groEL, HSPD1; chaperonin GroEL
groEL	K04077	6. Human Diseases	6.8 Infectious disease: bacterial	Tuberculosis	ko05152	groEL, HSPD1; chaperonin GroEL
petJ	K08906	1. Metabolism	1.2 Energy metabolism	Photosynthesis	ko00195	petJ; cytochrome c6
psbV	K02720	1. Metabolism	1.2 Energy metabolism	Photosynthesis	ko00195	psbV; photosystem II cytochrome c550
rpl27	K02899	2. Genetic Information Processing	2.2 Translation	Ribosome	ko03010	RP-L27, MRPL27, rpmA; large subunit ribosomal protein L27
rpl19	K02884	2. Genetic Information Processing	2.2 Translation	Ribosome	ko03010	RP-L19, MRPL19, rplS; large subunit ribosomal protein L19
petN	K03689	1. Metabolism	1.2 Energy metabolism	Photosynthesis	ko00195	petN; cytochrome b6-f complex subunit 8
petN	K03689	1. Metabolism	1.0 Global and overview maps	Metabolic pathways	ko01100	petN; cytochrome b6-f complex subunit 8
acsF	K04035	1. Metabolism	1.8 Metabolism of cofactors and vitamins	Porphyrin and chlorophyll metabolism	ko00860	E1.14.13.81, acsF, chlE; magnesium-protoporphyrin IX monomethyl ester (oxidative) cyclase [EC:1.14.13.81]
acsF	K04035	1. Metabolism	1.0 Global and overview maps	Metabolic pathways	ko01100	E1.14.13.81, acsF, chlE; magnesium-protoporphyrin IX monomethyl ester (oxidative) cyclase [EC:1.14.13.81]
acsF	K04035	1. Metabolism	1.0 Global and overview maps	Biosynthesis of secondary metabolites	ko01110	E1.14.13.81, acsF, chlE; magnesium-protoporphyrin IX monomethyl ester (oxidative) cyclase [EC:1.14.13.81]
ycf42	K03386	4. Cellular Processes	4.2 Cell growth and death	Apoptosis - fly	ko04214	PRDX2_4, ahpC; peroxiredoxin (alkyl hydroperoxide reductase subunit C) [EC:1.11.1.15]
rpl35	K02916	2. Genetic Information Processing	2.2 Translation	Ribosome	ko03010	RP-L35, MRPL35, rpmI; large subunit ribosomal protein L35
rpl20	K02887	2. Genetic Information Processing	2.2 Translation	Ribosome	ko03010	RP-L20, MRPL20, rplT; large subunit ribosomal protein L20
ilvH	K01653	1. Metabolism	1.5 Amino acid metabolism	Valine, leucine and isoleucine biosynthesis	ko00290	E2.2.1.6S, ilvH, ilvN; acetolactate synthase I/III small subunit [EC:2.2.1.6]
ilvH	K01653	1. Metabolism	1.1 Carbohydrate metabolism	Butanoate metabolism	ko00650	E2.2.1.6S, ilvH, ilvN; acetolactate synthase I/III small subunit [EC:2.2.1.6]
ilvH	K01653	1. Metabolism	1.1 Carbohydrate metabolism	C5-Branched dibasic acid metabolism	ko00660	E2.2.1.6S, ilvH, ilvN; acetolactate synthase I/III small subunit [EC:2.2.1.6]
ilvH	K01653	1. Metabolism	1.8 Metabolism of cofactors and vitamins	Pantothenate and CoA biosynthesis	ko00770	E2.2.1.6S, ilvH, ilvN; acetolactate synthase I/III small subunit [EC:2.2.1.6]
ilvH	K01653	1. Metabolism	1.0 Global and overview maps	Metabolic pathways	ko01100	E2.2.1.6S, ilvH, ilvN; acetolactate synthase I/III small subunit [EC:2.2.1.6]
ilvH	K01653	1. Metabolism	1.0 Global and overview maps	Biosynthesis of secondary metabolites	ko01110	E2.2.1.6S, ilvH, ilvN; acetolactate synthase I/III small subunit [EC:2.2.1.6]
ilvH	K01653	1. Metabolism	1.0 Global and overview maps	Biosynthesis of antibiotics	ko01130	E2.2.1.6S, ilvH, ilvN; acetolactate synthase I/III small subunit [EC:2.2.1.6]
ilvH	K01653	1. Metabolism	1.0 Global and overview maps	2-Oxocarboxylic acid metabolism	ko01210	E2.2.1.6S, ilvH, ilvN; acetolactate synthase I/III small subunit [EC:2.2.1.6]
ilvH	K01653	1. Metabolism	1.0 Global and overview maps	Biosynthesis of amino acids	ko01230	E2.2.1.6S, ilvH, ilvN; acetolactate synthase I/III small subunit [EC:2.2.1.6]
rbcL	K01601	1. Metabolism	1.1 Carbohydrate metabolism	Glyoxylate and dicarboxylate metabolism	ko00630	rbcL; ribulose-bisphosphate carboxylase large chain [EC:4.1.1.39]
rbcL	K01601	1. Metabolism	1.2 Energy metabolism	Carbon fixation in photosynthetic organisms	ko00710	rbcL; ribulose-bisphosphate carboxylase large chain [EC:4.1.1.39]
rbcL	K01601	1. Metabolism	1.0 Global and overview maps	Metabolic pathways	ko01100	rbcL; ribulose-bisphosphate carboxylase large chain [EC:4.1.1.39]
rbcL	K01601	1. Metabolism	1.0 Global and overview maps	Biosynthesis of secondary metabolites	ko01110	rbcL; ribulose-bisphosphate carboxylase large chain [EC:4.1.1.39]
rbcL	K01601	1. Metabolism	1.0 Global and overview maps	Microbial metabolism in diverse environments	ko01120	rbcL; ribulose-bisphosphate carboxylase large chain [EC:4.1.1.39]
rbcL	K01601	1. Metabolism	1.0 Global and overview maps	Biosynthesis of antibiotics	ko01130	rbcL; ribulose-bisphosphate carboxylase large chain [EC:4.1.1.39]
rbcL	K01601	1. Metabolism	1.0 Global and overview maps	Carbon metabolism	ko01200	rbcL; ribulose-bisphosphate carboxylase large chain [EC:4.1.1.39]
rbcS	K01602	1. Metabolism	1.1 Carbohydrate metabolism	Glyoxylate and dicarboxylate metabolism	ko00630	rbcS; ribulose-bisphosphate carboxylase small chain [EC:4.1.1.39]
rbcS	K01602	1. Metabolism	1.2 Energy metabolism	Carbon fixation in photosynthetic organisms	ko00710	rbcS; ribulose-bisphosphate carboxylase small chain [EC:4.1.1.39]
rbcS	K01602	1. Metabolism	1.0 Global and overview maps	Metabolic pathways	ko01100	rbcS; ribulose-bisphosphate carboxylase small chain [EC:4.1.1.39]
rbcS	K01602	1. Metabolism	1.0 Global and overview maps	Biosynthesis of secondary metabolites	ko01110	rbcS; ribulose-bisphosphate carboxylase small chain [EC:4.1.1.39]
rbcS	K01602	1. Metabolism	1.0 Global and overview maps	Microbial metabolism in diverse environments	ko01120	rbcS; ribulose-bisphosphate carboxylase small chain [EC:4.1.1.39]
rbcS	K01602	1. Metabolism	1.0 Global and overview maps	Biosynthesis of antibiotics	ko01130	rbcS; ribulose-bisphosphate carboxylase small chain [EC:4.1.1.39]
rbcS	K01602	1. Metabolism	1.0 Global and overview maps	Carbon metabolism	ko01200	rbcS; ribulose-bisphosphate carboxylase small chain [EC:4.1.1.39]
psaA	K02689	1. Metabolism	1.2 Energy metabolism	Photosynthesis	ko00195	psaA; photosystem I P700 chlorophyll a apoprotein A1
psaA	K02689	1. Metabolism	1.0 Global and overview maps	Metabolic pathways	ko01100	psaA; photosystem I P700 chlorophyll a apoprotein A1
psaB	K02690	1. Metabolism	1.2 Energy metabolism	Photosynthesis	ko00195	psaB; photosystem I P700 chlorophyll a apoprotein A2
psaB	K02690	1. Metabolism	1.0 Global and overview maps	Metabolic pathways	ko01100	psaB; photosystem I P700 chlorophyll a apoprotein A2
rps14	K02954	2. Genetic Information Processing	2.2 Translation	Ribosome	ko03010	RP-S14, MRPS14, rpsN; small subunit ribosomal protein S14
petG	K02640	1. Metabolism	1.2 Energy metabolism	Photosynthesis	ko00195	petG; cytochrome b6-f complex subunit 5
petG	K02640	1. Metabolism	1.0 Global and overview maps	Metabolic pathways	ko01100	petG; cytochrome b6-f complex subunit 5
psbK	K02712	1. Metabolism	1.2 Energy metabolism	Photosynthesis	ko00195	psbK; photosystem II PsbK protein
chlL	K04037	1. Metabolism	1.8 Metabolism of cofactors and vitamins	Porphyrin and chlorophyll metabolism	ko00860	chlL; light-independent protochlorophyllide reductase subunit L [EC:1.3.7.7]
chlL	K04037	1. Metabolism	1.0 Global and overview maps	Metabolic pathways	ko01100	chlL; light-independent protochlorophyllide reductase subunit L [EC:1.3.7.7]
chlL	K04037	1. Metabolism	1.0 Global and overview maps	Biosynthesis of secondary metabolites	ko01110	chlL; light-independent protochlorophyllide reductase subunit L [EC:1.3.7.7]
chlN	K04038	1. Metabolism	1.8 Metabolism of cofactors and vitamins	Porphyrin and chlorophyll metabolism	ko00860	chlN; light-independent protochlorophyllide reductase subunit N [EC:1.3.7.7]
chlN	K04038	1. Metabolism	1.0 Global and overview maps	Metabolic pathways	ko01100	chlN; light-independent protochlorophyllide reductase subunit N [EC:1.3.7.7]
chlN	K04038	1. Metabolism	1.0 Global and overview maps	Biosynthesis of secondary metabolites	ko01110	chlN; light-independent protochlorophyllide reductase subunit N [EC:1.3.7.7]
psaF	K02694	1. Metabolism	1.2 Energy metabolism	Photosynthesis	ko00195	psaF; photosystem I subunit III
psaF	K02694	1. Metabolism	1.0 Global and overview maps	Metabolic pathways	ko01100	psaF; photosystem I subunit III
psaJ	K02697	1. Metabolism	1.2 Energy metabolism	Photosynthesis	ko00195	psaJ; photosystem I subunit IX
petA	K02634	1. Metabolism	1.2 Energy metabolism	Photosynthesis	ko00195	petA; apocytochrome f
petA	K02634	1. Metabolism	1.0 Global and overview maps	Metabolic pathways	ko01100	petA; apocytochrome f
tatC	K03118	2. Genetic Information Processing	2.3 Folding, sorting and degradation	Protein export	ko03060	tatC; sec-independent protein translocase protein TatC
tatC	K03118	3. Environmental Information Processing	3.1 Membrane transport	Bacterial secretion system	ko03070	tatC; sec-independent protein translocase protein TatC
atpE	K02114	1. Metabolism	1.2 Energy metabolism	Oxidative phosphorylation	ko00190	ATPF1E, atpC; F-type H+-transporting ATPase subunit epsilon
atpE	K02114	1. Metabolism	1.2 Energy metabolism	Photosynthesis	ko00195	ATPF1E, atpC; F-type H+-transporting ATPase subunit epsilon
atpE	K02114	1. Metabolism	1.0 Global and overview maps	Metabolic pathways	ko01100	ATPF1E, atpC; F-type H+-transporting ATPase subunit epsilon
atpB	K02112	1. Metabolism	1.2 Energy metabolism	Oxidative phosphorylation	ko00190	ATPF1B, atpD; F-type H+/Na+-transporting ATPase subunit beta [EC:7.1.2.2 7.2.2.1]
atpB	K02112	1. Metabolism	1.2 Energy metabolism	Photosynthesis	ko00195	ATPF1B, atpD; F-type H+/Na+-transporting ATPase subunit beta [EC:7.1.2.2 7.2.2.1]
atpB	K02112	1. Metabolism	1.0 Global and overview maps	Metabolic pathways	ko01100	ATPF1B, atpD; F-type H+/Na+-transporting ATPase subunit beta [EC:7.1.2.2 7.2.2.1]
rpl33	K02913	2. Genetic Information Processing	2.2 Translation	Ribosome	ko03010	RP-L33, MRPL33, rpmG; large subunit ribosomal protein L33
psaC	K02691	1. Metabolism	1.2 Energy metabolism	Photosynthesis	ko00195	psaC; photosystem I subunit VII
psaC	K02691	1. Metabolism	1.0 Global and overview maps	Metabolic pathways	ko01100	psaC; photosystem I subunit VII
psbA	K02703	1. Metabolism	1.2 Energy metabolism	Photosynthesis	ko00195	psbA; photosystem II P680 reaction center D1 protein [EC:1.10.3.9]
psbA	K02703	1. Metabolism	1.0 Global and overview maps	Metabolic pathways	ko01100	psbA; photosystem II P680 reaction center D1 protein [EC:1.10.3.9]
psaI	K02696	1. Metabolism	1.2 Energy metabolism	Photosynthesis	ko00195	psaI; photosystem I subunit VIII
psbJ	K02711	1. Metabolism	1.2 Energy metabolism	Photosynthesis	ko00195	psbJ; photosystem II PsbJ protein
psbL	K02713	1. Metabolism	1.2 Energy metabolism	Photosynthesis	ko00195	psbL; photosystem II PsbL protein
psbF	K02708	1. Metabolism	1.2 Energy metabolism	Photosynthesis	ko00195	psbF; photosystem II cytochrome b559 subunit beta
psbF	K02708	1. Metabolism	1.0 Global and overview maps	Metabolic pathways	ko01100	psbF; photosystem II cytochrome b559 subunit beta
psbE	K02707	1. Metabolism	1.2 Energy metabolism	Photosynthesis	ko00195	psbE; photosystem II cytochrome b559 subunit alpha
psbE	K02707	1. Metabolism	1.0 Global and overview maps	Metabolic pathways	ko01100	psbE; photosystem II cytochrome b559 subunit alpha
psaL	K02699	1. Metabolism	1.2 Energy metabolism	Photosynthesis	ko00195	psaL; photosystem I subunit XI
psbY	K02723	1. Metabolism	1.2 Energy metabolism	Photosynthesis	ko00195	psbY; photosystem II PsbY protein
rpl21	K02888	2. Genetic Information Processing	2.2 Translation	Ribosome	ko03010	RP-L21, MRPL21, rplU; large subunit ribosomal protein L21
rpl3	K02906	2. Genetic Information Processing	2.2 Translation	Ribosome	ko03010	RP-L3, MRPL3, rplC; large subunit ribosomal protein L3
rpl4	K02926	2. Genetic Information Processing	2.2 Translation	Ribosome	ko03010	RP-L4, MRPL4, rplD; large subunit ribosomal protein L4
rpl23	K02892	2. Genetic Information Processing	2.2 Translation	Ribosome	ko03010	RP-L23, MRPL23, rplW; large subunit ribosomal protein L23
rpl2	K02886	2. Genetic Information Processing	2.2 Translation	Ribosome	ko03010	RP-L2, MRPL2, rplB; large subunit ribosomal protein L2
rps19	K02965	2. Genetic Information Processing	2.2 Translation	Ribosome	ko03010	RP-S19, rpsS; small subunit ribosomal protein S19
rpl22	K02890	2. Genetic Information Processing	2.2 Translation	Ribosome	ko03010	RP-L22, MRPL22, rplV; large subunit ribosomal protein L22
rps3	K02982	2. Genetic Information Processing	2.2 Translation	Ribosome	ko03010	RP-S3, rpsC; small subunit ribosomal protein S3
rpl16	K02878	2. Genetic Information Processing	2.2 Translation	Ribosome	ko03010	RP-L16, MRPL16, rplP; large subunit ribosomal protein L16
rps17	K02961	2. Genetic Information Processing	2.2 Translation	Ribosome	ko03010	RP-S17, MRPS17, rpsQ; small subunit ribosomal protein S17
rpl14	K02874	2. Genetic Information Processing	2.2 Translation	Ribosome	ko03010	RP-L14, MRPL14, rplN; large subunit ribosomal protein L14
rpl24	K02895	2. Genetic Information Processing	2.2 Translation	Ribosome	ko03010	RP-L24, MRPL24, rplX; large subunit ribosomal protein L24
rpl5	K02931	2. Genetic Information Processing	2.2 Translation	Ribosome	ko03010	RP-L5, MRPL5, rplE; large subunit ribosomal protein L5
rps8	K02994	2. Genetic Information Processing	2.2 Translation	Ribosome	ko03010	RP-S8, rpsH; small subunit ribosomal protein S8
rpl6	K02933	2. Genetic Information Processing	2.2 Translation	Ribosome	ko03010	RP-L6, MRPL6, rplF; large subunit ribosomal protein L6
rpl18	K02881	2. Genetic Information Processing	2.2 Translation	Ribosome	ko03010	RP-L18, MRPL18, rplR; large subunit ribosomal protein L18
rps5	K02988	2. Genetic Information Processing	2.2 Translation	Ribosome	ko03010	RP-S5, MRPS5, rpsE; small subunit ribosomal protein S5
rpl36	K02919	2. Genetic Information Processing	2.2 Translation	Ribosome	ko03010	RP-L36, MRPL36, rpmJ; large subunit ribosomal protein L36
rps13	K02952	2. Genetic Information Processing	2.2 Translation	Ribosome	ko03010	RP-S13, rpsM; small subunit ribosomal protein S13
rps11	K02948	2. Genetic Information Processing	2.2 Translation	Ribosome	ko03010	RP-S11, MRPS11, rpsK; small subunit ribosomal protein S11
rpoA	K03040	2. Genetic Information Processing	2.1 Transcription	RNA polymerase	ko03020	rpoA; DNA-directed RNA polymerase subunit alpha [EC:2.7.7.6]
rpl13	K02871	2. Genetic Information Processing	2.2 Translation	Ribosome	ko03010	RP-L13, MRPL13, rplM; large subunit ribosomal protein L13
rps9	K02996	2. Genetic Information Processing	2.2 Translation	Ribosome	ko03010	RP-S9, MRPS9, rpsI; small subunit ribosomal protein S9
rpl31	K02909	2. Genetic Information Processing	2.2 Translation	Ribosome	ko03010	RP-L31, rpmE; large subunit ribosomal protein L31
rps12	K02950	2. Genetic Information Processing	2.2 Translation	Ribosome	ko03010	RP-S12, MRPS12, rpsL; small subunit ribosomal protein S12
rps7	K02992	2. Genetic Information Processing	2.2 Translation	Ribosome	ko03010	RP-S7, MRPS7, rpsG; small subunit ribosomal protein S7
tufA	K02358	5. Organismal Systems	5.10 Environmental adaptation	Plant-pathogen interaction	ko04626	tuf, TUFM; elongation factor Tu
rps10	K02946	2. Genetic Information Processing	2.2 Translation	Ribosome	ko03010	RP-S10, MRPS10, rpsJ; small subunit ribosomal protein S10
psaE	K02693	1. Metabolism	1.2 Energy metabolism	Photosynthesis	ko00195	psaE; photosystem I subunit IV
psaE	K02693	1. Metabolism	1.0 Global and overview maps	Metabolic pathways	ko01100	psaE; photosystem I subunit IV
psbH	K02709	1. Metabolism	1.2 Energy metabolism	Photosynthesis	ko00195	psbH; photosystem II PsbH protein
psbT	K02718	1. Metabolism	1.2 Energy metabolism	Photosynthesis	ko00195	psbT; photosystem II PsbT protein
psbB	K02704	1. Metabolism	1.2 Energy metabolism	Photosynthesis	ko00195	psbB; photosystem II CP47 chlorophyll apoprotein
psbB	K02704	1. Metabolism	1.0 Global and overview maps	Metabolic pathways	ko01100	psbB; photosystem II CP47 chlorophyll apoprotein
petF	K02639	1. Metabolism	1.2 Energy metabolism	Photosynthesis	ko00195	petF; ferredoxin
rpl12	K02935	2. Genetic Information Processing	2.2 Translation	Ribosome	ko03010	RP-L7, MRPL12, rplL; large subunit ribosomal protein L7/L12
rpl1	K02863	2. Genetic Information Processing	2.2 Translation	Ribosome	ko03010	RP-L1, MRPL1, rplA; large subunit ribosomal protein L1
rpl11	K02867	2. Genetic Information Processing	2.2 Translation	Ribosome	ko03010	RP-L11, MRPL11, rplK; large subunit ribosomal protein L11
rpl9	K02939	2. Genetic Information Processing	2.2 Translation	Ribosome	ko03010	RP-L9, MRPL9, rplI; large subunit ribosomal protein L9
psbW	K08903	1. Metabolism	1.2 Energy metabolism	Photosynthesis	ko00195	psb28; photosystem II 13kDa protein
syfB	K01890	2. Genetic Information Processing	2.2 Translation	Aminoacyl-tRNA biosynthesis	ko00970	FARSB, pheT; phenylalanyl-tRNA synthetase beta chain [EC:6.1.1.20]
psbD	K02706	1. Metabolism	1.2 Energy metabolism	Photosynthesis	ko00195	psbD; photosystem II P680 reaction center D2 protein [EC:1.10.3.9]
psbD	K02706	1. Metabolism	1.0 Global and overview maps	Metabolic pathways	ko01100	psbD; photosystem II P680 reaction center D2 protein [EC:1.10.3.9]
psbC	K02705	1. Metabolism	1.2 Energy metabolism	Photosynthesis	ko00195	psbC; photosystem II CP43 chlorophyll apoprotein
psbC	K02705	1. Metabolism	1.0 Global and overview maps	Metabolic pathways	ko01100	psbC; photosystem II CP43 chlorophyll apoprotein
ilvB	K01652	1. Metabolism	1.5 Amino acid metabolism	Valine, leucine and isoleucine biosynthesis	ko00290	E2.2.1.6L, ilvB, ilvG, ilvI; acetolactate synthase I/II/III large subunit [EC:2.2.1.6]
ilvB	K01652	1. Metabolism	1.1 Carbohydrate metabolism	Butanoate metabolism	ko00650	E2.2.1.6L, ilvB, ilvG, ilvI; acetolactate synthase I/II/III large subunit [EC:2.2.1.6]
ilvB	K01652	1. Metabolism	1.1 Carbohydrate metabolism	C5-Branched dibasic acid metabolism	ko00660	E2.2.1.6L, ilvB, ilvG, ilvI; acetolactate synthase I/II/III large subunit [EC:2.2.1.6]
ilvB	K01652	1. Metabolism	1.8 Metabolism of cofactors and vitamins	Pantothenate and CoA biosynthesis	ko00770	E2.2.1.6L, ilvB, ilvG, ilvI; acetolactate synthase I/II/III large subunit [EC:2.2.1.6]
ilvB	K01652	1. Metabolism	1.0 Global and overview maps	Metabolic pathways	ko01100	E2.2.1.6L, ilvB, ilvG, ilvI; acetolactate synthase I/II/III large subunit [EC:2.2.1.6]
ilvB	K01652	1. Metabolism	1.0 Global and overview maps	Biosynthesis of secondary metabolites	ko01110	E2.2.1.6L, ilvB, ilvG, ilvI; acetolactate synthase I/II/III large subunit [EC:2.2.1.6]
ilvB	K01652	1. Metabolism	1.0 Global and overview maps	Biosynthesis of antibiotics	ko01130	E2.2.1.6L, ilvB, ilvG, ilvI; acetolactate synthase I/II/III large subunit [EC:2.2.1.6]
ilvB	K01652	1. Metabolism	1.0 Global and overview maps	2-Oxocarboxylic acid metabolism	ko01210	E2.2.1.6L, ilvB, ilvG, ilvI; acetolactate synthase I/II/III large subunit [EC:2.2.1.6]
ilvB	K01652	1. Metabolism	1.0 Global and overview maps	Biosynthesis of amino acids	ko01230	E2.2.1.6L, ilvB, ilvG, ilvI; acetolactate synthase I/II/III large subunit [EC:2.2.1.6]
rps4	K02986	2. Genetic Information Processing	2.2 Translation	Ribosome	ko03010	RP-S4, rpsD; small subunit ribosomal protein S4
rps16	K02959	2. Genetic Information Processing	2.2 Translation	Ribosome	ko03010	RP-S16, MRPS16, rpsP; small subunit ribosomal protein S16
