# Supplementary material for: Chloroplast genome sequencing and evolutionary analysis of Ecklonia maxima and its comparison and phylogenetic analysis with its close relatives
Source: Research Square preprint supplement (doi:10.21203/rs.3.rs-7481212/v1), 2025-10-08
Supplement: Supplementary file 4 [file 9f560bd5af92333b6b6f3d16.xlsx]

## Sheet: Sheet1
Table S3 GO functional analysis of E.maxima cp genomes
NO.	Namespace	Description	Number	Percent	ID	Genes
1	biological_process	reproduction	3	0.0303	GO:0000003	petD;rpl6;tatC
2	biological_process	immune system process	1	0.0101	GO:0002376	atpB
3	molecular_function	catalytic activity	15	0.1515	GO:0003824	acsF;atpB;atpH;atpI;chlI;clpC;ftrB;ftsH;ilvB;ilvH;petD;rpl16;rps14;ycf24;ycf42
4	molecular_function	structural molecule activity	31	0.3131	GO:0005198	rpl1;rpl11;rpl13;rpl14;rpl16;rpl19;rpl2;rpl20;rpl22;rpl23;rpl27;rpl29;rpl4;rpl5;rpl6;rpl9;rps10;rps12;rps13;rps14;rps16;rps17;rps18;rps19;rps2;rps3;rps4;rps5;rps7;rps8;rps9
5	molecular_function	transporter activity	5	0.0505	GO:0005215	atpB;atpH;atpI;tatC;ycf24
6	molecular_function	binding	31	0.3131	GO:0005488	acsF;atpB;clpC;dnaK;ftrB;ilvB;ilvH;pafII;petD;psaB;psaD;psaE;psaF;psaL;rpl1;rpl11;rpl13;rpl14;rpl16;rpl18;rpl2;rpl23;rpl4;rpl5;rpl6;rpl9;rps10;rps14;rps4;rps7;rps9
7	cellular_component	intracellular	98	0.9898	GO:0005622	acsF;atpB;atpD;atpH;atpI;cbbx;ccsA;chlB;chlI;chlL;chlN;clpC;dnaB;dnaK;ftrB;ftsH;groEL;ilvB;ilvH;pafI;pafII;petA;petB;petD;petG;psaA;psaB;psaC;psaD;psaE;psaF;psaL;psbA;psbB;psbC;psbD;psbF;psbH;psbL;rbcL;rbcR;rbcS;rpl1;rpl11;rpl12;rpl13;rpl14;rpl16;rpl18;rpl19;rpl2;rpl20;rpl21;rpl22;rpl23;rpl24;rpl27;rpl29;rpl3;rpl31;rpl35;rpl36;rpl4;rpl5;rpl6;rpl9;rpoA;rpoB;rpoC1;rpoC2;rps10;rps11;rps12;rps13;rps1…
8	biological_process	metabolic process	46	0.4646	GO:0008152	acsF;atpB;atpD;atpE;atpH;atpI;ccsA;chlI;clpC;ftrB;ftsH;ilvB;ilvH;pafI;pafII;petD;psbB;rpl1;rpl11;rpl12;rpl13;rpl16;rpl19;rpl2;rpl22;rpl23;rpl24;rpl29;rpl4;rpl5;rpl6;rpl9;rps10;rps12;rps13;rps14;rps16;rps17;rps18;rps2;rps3;rps5;rps7;rps9;ycf37;ycf42
9	biological_process	cellular process	51	0.5151	GO:0009987	acsF;atpB;atpD;atpE;atpH;atpI;chlI;clpC;dnaK;ftrB;ftsH;ilvB;ilvH;pafI;pafII;petD;psbB;rpl1;rpl11;rpl12;rpl13;rpl16;rpl19;rpl2;rpl20;rpl22;rpl23;rpl24;rpl29;rpl4;rpl5;rpl6;rpl9;rps10;rps12;rps13;rps14;rps16;rps17;rps18;rps19;rps2;rps3;rps5;rps7;rps9;secY;tatC;ycf24;ycf37;ycf42
10	molecular_function	antioxidant activity	1	0.0101	GO:0016209	ycf42
11	biological_process	reproductive process	3	0.0303	GO:0022414	petD;rpl6;tatC
12	biological_process	multicellular organismal process	4	0.0404	GO:0032501	atpI;petD;rpl6;rps5
13	biological_process	developmental process	4	0.0404	GO:0032502	atpI;petD;rpl6;rps5
14	cellular_component	protein-containing complex	45	0.4545	GO:0032991	atpB;atpH;atpI;chlI;clpC;ilvB;ilvH;petD;psbC;psbH;rpl1;rpl11;rpl12;rpl13;rpl14;rpl16;rpl19;rpl2;rpl22;rpl23;rpl24;rpl29;rpl4;rpl5;rpl6;rpl9;rpoB;rpoC1;rpoC2;rps10;rps12;rps13;rps14;rps16;rps17;rps18;rps19;rps2;rps3;rps4;rps5;rps7;rps8;rps9;tatC
15	biological_process	growth	1	0.0101	GO:0040007	rpl29
16	biological_process	locomotion	1	0.0101	GO:0040011	atpI
17	biological_process	interspecies interaction between organisms	4	0.0404	GO:0044419	atpB;atpD;rpl12;ycf42
18	biological_process	response to stimulus	17	0.1717	GO:0050896	atpB;atpD;atpI;chlI;clpC;dnaK;ftsH;pafI;petD;psaE;rpl12;rpl13;rpl14;rpl27;rpl6;rps5;ycf42
19	biological_process	localization	10	0.101	GO:0051179	atpB;atpE;atpH;atpI;ccsA;clpC;dnaK;petD;tatC;ycf24
20	biological_process	multi-organism process	6	0.0606	GO:0051704	atpB;atpD;petD;rpl12;tatC;ycf42
21	biological_process	biological regulation	8	0.0808	GO:0065007	acsF;atpI;clpC;ftsH;ilvH;pafI;rps4;ycf24
22	biological_process	detoxification	1	0.0101	GO:0098754	ycf42
23	cellular_component	cellular anatomical entity	97	0.9797	GO:0110165	acsF;atpB;atpD;atpH;atpI;cbbx;ccsA;chlB;chlI;chlL;chlN;clpC;dnaB;dnaK;ftrB;ftsH;groEL;ilvB;ilvH;pafI;pafII;petA;petB;petD;petG;psaA;psaB;psaC;psaD;psaE;psaF;psaL;psbA;psbB;psbC;psbD;psbF;psbH;psbL;rbcL;rbcR;rbcS;rpl1;rpl11;rpl12;rpl13;rpl14;rpl16;rpl18;rpl19;rpl2;rpl20;rpl21;rpl22;rpl23;rpl24;rpl27;rpl29;rpl3;rpl31;rpl35;rpl36;rpl4;rpl5;rpl6;rpl9;rpoA;rpoB;rpoC1;rps10;rps11;rps12;rps13;rps14;rps1…
