# Supplementary material for: Chloroplast genome sequencing and evolutionary analysis of Ecklonia maxima and its comparison and phylogenetic analysis with its close relatives
Source: Research Square preprint supplement (doi:10.21203/rs.3.rs-7481212/v1), 2025-10-08
Supplement: Supplementary file 5 [file f43d09d5521f16a8a7d817f5.xlsx]

## Sheet: Table S1. Long repeat of of  E.
Table S1:Long repeat of E. maxima cp genome
ID	Length	Type	Seq_A_id	Repeat_A_start	Repeat_A_end	Seq_B_id	Repeat_B_start	Repeat_B_end	Hamming_Distance	E-value	Gene_A	Gene_B	Repeat_A_seq	Repeat_B_seq
R1	5484	P	M.Chl	76992	82475	M.Chl	125417	130900	0	0.00e+00	trnL-UAG;rpl21	ycf37;ycf17	TATAATTTAGCTAATTATTACTACAGTATTGCCCTTGAAATTATTCCCGATTATACATTAGCTTTGACCAATCTTGGTTATAGTTATGAAAAACTTAATTTATCAGTAGAGTCTTATAATTGTTATAAGAATGCGTTAGTATGGGACCCTGAGAATAGATTAGCTTCTTCACGGATATTAGTCGTTGAAAAAAAATTAAGATATCTAGTTGCTCCTCGATAAAGGGTTAAAGGGGTTTTAAAAAAATTATCTGATAATAAACCAAAGCTTTCTGTGCTGAGCCTTTTTGAATATTGACAATTTGTTCATATGCTATGTAATCTAGAGTACAGGGTGAAAACATATTTCTTACAATAAGAAATAGGAGAGAGCTAAATATAATTATTATTTTTATCTCTT…	AGTTAATCGATTAAACTCAATAAATTTTTTAGGTTCTACCCAAAATTGACGACCACTGGCTTCTATAATTGCGTATTCCATTGAATAAAAATTATATAACCCTAAGTAATAGTTTTTCAAATTTCTTGATACTATTCTGTTTTATTTTTTAAATTCTAAGTCAAACATAAAAGTCCTGGCATAAGCTATCTTCCCAAAGGACTCCTCCTTAAGTATTGTAACTGTTATAGCGTTTCACCATTGAGTTCGAAATGGATCAATGTGGTTCCACTATCCTTTAAACACCAAGACAATATTTTTTAAAGCTAGAAAAAAGTTCAAGTCCTCGATCTATTAGTACATCTCAGCTTAATATATTACTATACTTCTACTTGATGCCTATTTGCAAACCGTTCTTAA…
R2	148	P	M.Chl	72082	72229	M.Chl	72082	72229	0	1.51e-79	psaI	psaI	TTGCTATGGGCTTATTGTTTATCTATATTGAAAAAGACACCATTGAATAACTTTCGAAATTCCCAAGGTTCTCTAGAGAACCTTGGGAATTTCGAAAGTTATTCAATGGTGTCTTTTTCAATATAGATAAACAATAAGCCCATAGCAA	TTGCTATGGGCTTATTGTTTATCTATATTGAAAAAGACACCATTGAATAACTTTCGAAATTCCCAAGGTTCTCTAGAGAACCTTGGGAATTTCGAAAGTTATTCAATGGTGTCTTTTTCAATATAGATAAACAATAAGCCCATAGCAA
R3	121	P	M.Chl	103084	103204	M.Chl	103084	103204	-3	2.12e-56	rpl12	rpl12	TGAAATAATTGTTTAACTACTCCTTTAGTAAATCTAAAGATCAATCATGTTTTCCTACCCTAGGTAGGAAAACATGATTGATCTTTAGATTTACTAAAGGAGTAGTTAAACAATTATTTCA	TGAAATAATTGTTTAACTACTCCTTTAGTAAATCTAAAGATCAATCATGTTTTCCTACCCTAGGTAGGAAAACATGATTGATCTTTAGATTTACTAAAGGAGTAGTTAAACAATTATTTCA
R4	83	P	M.Chl	30584	30666	M.Chl	30655	30737	-3	5.11e-34	_	psbI	TAACGATCCCTCAAGAAATCCAAACCGAAAAGATTTCGAATAAGATATAGTATAACGTAAAGTACTAACCGTATTTCTAAATA	TATTTCTAAATAAGGTTAGTACTTTACGTTATACTATATCTTATTCGAAATCTTTTCGGTTTGGATTTCTTGAGGGATCGTTA
R5	80	F	M.Chl	46813	46892	M.Chl	112142	112221	-2	3.75e-34	_	_	AATGGGCTCATCGTCTAATGGATAAAGACCGGAACCTTCTAAGTTTCTAATGTAGGTTCAATTCCTTCTGGGCCTGCTCA	AATGGGCTCATCGTCTAATGGATAAAGACCGAAACCTTCTAAGTTTCTAATGTAGGTTCAATTCCTTCTGAGCCTGCTCA
R6	65	P	M.Chl	74668	74732	M.Chl	74695	74759	-3	1.67e-23	psaL	rbcR	TTCTTAATTTAGATTATTAGTTAAGTAGTTTTTGAACATCTTAAAAATTTAAGATGTTCAAAAAC	GTTTTTGAACATCTTAAAAATTTAAGATGTTCAAAAACCACTTAACTAATAATCTAAATTAAGAA
R7	58	P	M.Chl	60414	60471	M.Chl	60414	60471	-2	3.45e-21	tatC	tatC	TAGTAAAAAAAGAGGTTACATAAGGACTTAAGTCCTTATATAACCTCTTTTTTTACTA	TAGTAAAAAAAGAGGTTACATAAGGACTTAAGTCCTTATATAACCTCTTTTTTTACTA
R8	53	F	M.Chl	76386	76438	M.Chl	76438	76490	0	2.38e-22	_	_	AGTTTGTTTTTCTTTGCACTTGACAAGAATAATAAAATTTAGGTATACATATA	AGTTTGTTTTTCTTTGCACTTGACAAGAATAATAAAATTTAGGTATACATATA
R9	48	F	M.Chl	46845	46892	M.Chl	112174	112221	-1	3.50e-17	trnR-UCU	trnR-UCU	AACCTTCTAAGTTTCTAATGTAGGTTCAATTCCTTCTGGGCCTGCTCA	AACCTTCTAAGTTTCTAATGTAGGTTCAATTCCTTCTGAGCCTGCTCA
R10	48	P	M.Chl	100271	100318	M.Chl	100330	100377	0	2.43e-19	_	_	ATCGTAAATTCTAGGTAATGCTTCCTCTCTTTCATTCCATTTTATTTT	AAAATAAAATGGAATGAAAGAGAGGAAGCATTACCTAGAATTTACGAT
R11	43	P	M.Chl	3183	3225	M.Chl	3183	3225	-3	8.30e-11	_	_	TAGACTTTAAACGCTTAAAAAATTTTTAAGTGTTTAAAGTCTA	TAGACTTTAAACGCTTAAAAAATTTTTAAGTGTTTAAAGTCTA
R12	38	P	M.Chl	73953	73990	M.Chl	73953	73990	0	2.55e-13	_	_	GACTAAAAGGAATTAAATTAATTTAATTCCTTTTAGTC	GACTAAAAGGAATTAAATTAATTTAATTCCTTTTAGTC
R13	38	P	M.Chl	67720	67757	M.Chl	67720	67757	-2	1.61e-09	_	_	TAGCCAAGTCTAGTTTATATATAAACTAGATTTGGCTA	TAGCCAAGTCTAGTTTATATATAAACTAGATTTGGCTA
R14	37	P	M.Chl	59357	59393	M.Chl	59357	59393	-1	1.13e-10	_	_	AATAAACTAAAGAAAAATTATTTTTCTTTAGTTTATT	AATAAACTAAAGAAAAATTATTTTTCTTTAGTTTATT
R15	37	P	M.Chl	46629	46665	M.Chl	46629	46665	-3	2.14e-07	_	_	TATTTTATGTTTAGAAATAACTTCTAAACATAAAATA	TATTTTATGTTTAGAAATAACTTCTAAACATAAAATA
R16	31	F	M.Chl	69039	69069	M.Chl	116461	116491	-3	5.07e-04	psbA	psbD	ACCCATTCCATATGGCGGGTGTTGCTGGTGT	ACCCATTCCATATGATGGGTGTTGCTGGTAT
R17	31	F	M.Chl	48352	48382	M.Chl	50575	50605	-3	5.07e-04	psaA	psaB	TAGTTGCTCATCATATGTATGCAATGCCGCC	TAGTTGCTCAACATATGTACGCAATACCGCC
R18	31	F	M.Chl	64643	64673	M.Chl	64692	64722	-2	1.75e-05	_	_	AATTTTTTTATTTTAAATAATATTAAAATTA	ATTTTTCTTATTTTAAATAATATTAAAATTA
R19	31	P	M.Chl	67650	67680	M.Chl	115562	115592	-3	5.07e-04	trnK-UUU	trnN-GUU	TCGGTTAAAAGCCGATTACTCTACCATTGAG	CTCAGTGGTAGAGCAATCGGCTGTTAACCGA
R20	31	P	M.Chl	69633	69663	M.Chl	69633	69663	-3	5.07e-04	_	_	AGTAATAAGAAGTTTTATACTTCTTATTACT	AGTAATAAGAAGTTTTATACTTCTTATTACT
R21	30	P	M.Chl	46728	46757	M.Chl	46728	46757	-2	6.55e-05	_	_	ATCGTATATATATATATATATACATACGAT	ATCGTATATATATATATATATACATACGAT
R22	30	P	M.Chl	43096	43125	M.Chl	43096	43125	-2	6.55e-05	_	_	TGAAGTTTGATAGTTAACTATCAAACTTTA	TGAAGTTTGATAGTTAACTATCAAACTTTA
